# Supplementary material for: Universal, school-based interventions to promote mental and emotional well-being: what is being done in the UK and does it work? A systematic review
Source: PubMed Central journal article supplement (PMC6129100; doi:10.1136/bmjopen-2018-022560), 2018-09-08
Supplement: bmjopen-2018-022560.draft_revisions.pdf [file bmjopen-2018-022560.draft_revisions.pdf]

# BMJ Open

BMJ Open is committed to open peer review. As part of this commitment we make the peer review history of every article we publish publicly available.

When an article is published we post the peer reviewers' comments and the authors' responses online. We also post the versions of the paper that were used during peer review. These are the versions that the peer review comments apply to.

The versions of the paper that follow are the versions that were submitted during the peer review process. They are not the versions of record or the final published versions. They should not be cited or distributed as the published version of this manuscript.

BMJ Open is an open access journal and the full, final, typeset and author-corrected version of record of the manuscript is available on our site with no access controls, subscription charges or pay-per-view fees (<http://bmjopen.bmj.com>).

If you have any questions on BMJ Open's open peer review process please email [info.bmjopen@bmj.com](mailto:info.bmjopen@bmj.com)

# BMJ Open

**Universal, school-based interventions to promote mental and emotional wellbeing. What is being done in the UK and does it work?  
A systematic review**

|                               |                                                                                                                              |
|-------------------------------|------------------------------------------------------------------------------------------------------------------------------|
| Journal:                      | <i>BMJ Open</i>                                                                                                              |
| Manuscript ID                 | bmjopen-2018-022560                                                                                                          |
| Article Type:                 | Research                                                                                                                     |
| Date Submitted by the Author: | 07-Mar-2018                                                                                                                  |
| Complete List of Authors:     | Mackenzie, Karen; NHS Ayrshire and Arran, Psychological Services<br>Williams, Christopher; University of Glasgow, Psychiatry |
| Keywords:                     | school based, intervention, wellbeing, review, resilience, MENTAL HEALTH                                                     |
|                               |                                                                                                                              |

SCHOLARONE™  
Manuscripts

Peer review only

1  
2  
3  
4  
5  
6  
7  
8  
9  
10  
11  
12  
13  
14  
15  
16  
17  
18  
19  
20  
21  
22  
23  
24  
25  
26  
27  
28  
29  
30  
31  
32  
33  
34  
35  
36  
37  
38  
39  
40  
41  
42  
43  
44  
45  
46  
47  
48  
49  
50  
51  
52  
53  
54  
55  
56  
57  
58  
59  
60

1  
2  
3  
4  
5  
6  
7

# Universal, school-based interventions to promote mental and emotional wellbeing. What is being done in the UK and does it work?

## A systematic review

Karen Mackenzie\*, Chris Williams\*\*

11 Address for correspondence:

12 \*Psychological Services NHS Ayrshire and Arran

13 Ayrshire Central Hospital

14 Kilwinning Road

15 Irvine KA12 8SS

16 Email: kazmack2@gmail.com

17  
18 \*\*Mental Health and Wellbeing

19 University of Glasgow

20 1<sup>st</sup> Floor, Administrative Building,

21 Gartnavel Royal Hospital

22 1055 Great Western Road

23 Glasgow

24 G12 0XY

25 E-mail: chris.williams@glasgow.ac.uk

26 **Keywords:** Review, school-based, resilience, wellbeing, intervention.

27 **Word count:** 5067 (excluding abstract, figures, tables and references).

28

29 **ABSTRACT**

30 **Objectives:** The present review aimed to assess the quality, content and  
31 evidence of efficacy of universally-delivered (to all pupils) school-based, mental  
32 health interventions designed to promote wellbeing and resilience, provided  
33 within the UK.

34 **Setting:** A systematic review of published literature set within UK  
35 mainstream school settings was conducted.

36 **Participants:** 12 studies were included for review (5 primary school  
37 based, 7 secondary school based).

38 **Interventions:** Selected studies included intervention approaches such as  
39 CBT, mental health education, mindfulness and behavioural approaches.

40 **Results:** Effectiveness of school-based universal interventions was found  
41 to be neutral or small with more positive effects found for poorer quality studies  
42 and those based in Primary schools (pupils aged 9-12 years old). Studies varied  
43 widely in their use of measures and study design. Methodological issues such as  
44 small sample size, varying course fidelity and lack of randomisation reduced  
45 overall study quality. Where there were several positive outcomes, effect sizes  
46 were small and methodological issues rendered many results to be interpreted  
47 with caution. Overall, results suggested a trend whereby higher quality studies  
48 reported less positive effects. The only study that conducted a health economic  
49 analysis suggested the intervention was not cost-effective.

50 **Conclusions:** The current evidence suggests there are neutral to small  
51 effects of universal, school-based interventions in the UK that aim to promote  
52 emotional or mental wellbeing or the prevention of mental health difficulties.  
53 Robust, long-term methodologies need to be pursued ensuring adequate  
54 recording of fidelity, the use of validated measures sensitive to mechanisms of  
55 change, reporting of those lost to follow up and any adverse effects. Further  
56 high quality and large scale research is required across the UK in order to  
57 robustly test any long-term benefits for pupils or on the wider educational or  
58 health system.

59

60

1  
2  
3  
4  
5  
6  
7  
8  
9  
10  
11  
12  
13  
14  
15  
16  
17  
18  
19  
20  
21  
22  
23  
24  
25  
26  
27  
28  
29  
30  
31  
32  
33  
34  
35  
36  
37  
38  
39  
40  
41  
42  
43  
44  
45  
46  
47  
48  
49  
50  
51  
52  
53  
54  
55  
56  
57  
58  
59  
60

61 **Limitations:**

- 62 ○ Included papers largely based in England so unlikely to be  
63 representative of the cultural diversity within UK schools.  
64 ○ Date limit excluded papers published prior to 2000.

65 **Strengths:**

- 66 ○ Addressed a gap in the literature.  
67 ○ Used a robust methodology to review the literature in this area.  
68 ○ Conclusions will help inform policy and practice as this topic continues  
69 to be debated in current health, education and political spheres.  
70

71 **INTRODUCTION**

72 The mental and emotional wellbeing of children and young people has  
73 received increasing attention worldwide. It has been reported that the  
74 prevalence of mental health problems ranges from 10-20% [1], and that by the  
75 age of 18 up to 20% of young people will have experienced an emotional disorder  
76 [2]. Mental health conditions such as anxiety and depression often persist into  
77 adulthood [3] and have been associated with a range of negative outcomes  
78 including lower academic achievement, higher likelihood of health risk  
79 behaviours, self-harm and suicide [4, 5]. However, provision of services for those  
80 in need can be as low as 20% [6]. Such access issues to specialist services like  
81 CAMHS has meant that school-based interventions have been increasingly  
82 explored due to their far reach [7] and existing infrastructure to support child  
83 development [8], while noting that schools need support to use the evidence  
84 base when applying such interventions [9].  
85

86 Numerous systematic reviews and meta-analyses have been conducted to  
87 review the effectiveness of school-based, mental health interventions at both  
88 the universal (delivered to all pupils irrespective of perceived need), and  
89 targeted (delivered to vulnerable or 'high risk' individuals only) levels. Overall,  
90 this literature has indicated mixed results regarding efficacy of school-based  
91 interventions.

1 92 Findings have suggested positive effects on social emotional skills, self-  
2 93 concept, positive social behaviours, conduct problems, emotional distress and  
3 94 problem solving when reviewing school based, universal programs aiming to  
4 95 enhance social and emotional skills [10-11]. Further reviews found Cognitive  
5 96 Behavioural Therapy (CBT) formed the basis of the majority of anxiety  
6 97 prevention programs (78%) and over 75% of trials reported a significant reduction  
7 98 in anxiety [12]. CBT-based interventions were also tentatively endorsed as mildly  
8 99 effective in reducing depression (E.S. = 0.29) and moderately effective (E.S. =  
9 100 0.50) in reducing anxiety symptoms [13].  
10 101

11 102 With regards to optimal implementation, it has been noted that more  
12 103 positive outcomes were obtained for programs adopting a ‘whole-school’  
13 104 approach, that lasted more than one year, and aimed to promote mental health  
14 105 rather than prevent mental illness [11]. A balance of both universal and targeted  
15 106 approaches has been recommended, along with accurate implementation of  
16 107 interventions [14].  
17 108

18 109 However, the long-term impact and target audience of such initiatives has  
19 110 been questioned. A meta-analysis reviewing prevention of depression  
20 111 programmes found that while there was evidence of immediate post-  
21 112 intervention effects, these did not sustain over time (24-36 months) [15].  
22 113 Moreover, a review evaluating both anxiety and depression programmes found  
23 114 that while the majority were effective for depression (65%) and anxiety (73%),  
24 115 the effect sizes were small (0.12 - 0.29) [16].  
25 116

26 117 It has also been argued that universal prevention interventions are,  
27 118 overall, not efficacious [17-18], with targeted programs being most effective  
28 119 (E.S. = 0.21 to 1.40). Likewise, that while school-based CBT programmes have  
29 120 been demonstrated to lead to a short-term reduction in depression symptoms,  
30 121 interventions are most effective for those in the clinical range [19].  
31 122

32 123 The literature has, therefore, conveyed conflicting results regarding the  
33 124 efficacy of universal school-based interventions whilst consistently in  
34 125 highlighting methodological issues within the existing research base. Common  
35

1 126 issues include a lack of active intervention controls [20], studies'  
2  
3 127 operationalisation and measurements of 'resilience' lack homogeneity [21]; that  
4  
5 128 weak program fidelity and treatment dosage impacts outcomes [10] and that  
6  
7 129 there is insufficient use of validated, standardised measures and long-term  
8  
9 130 follow up [22].  
10

131

11 132 It is also noteworthy that the majority of reviews have focussed  
12  
13 133 worldwide, with most reviewed interventions based in Australia, the US or  
14  
15 134 Canada. No reviews have to date focused on studies in schools in the UK. This  
16  
17 135 trend was also referenced in a NICE funded review [23] of targeted and universal  
18  
19 136 school-based interventions who noted that though findings from international  
20  
21 137 based research are helpful, the generalisability to the UK educational system is  
22  
23 138 questionable. Thus, giving rise to a need for reviews specifically within the UK  
24  
25 139 context.

140

26 141 One systematic review of targeted school-based interventions within the  
27  
28 142 UK research has been conducted [24]. This found that nurture groups  
29  
30 143 demonstrate an immediate positive impact on the social and emotional  
31  
32 144 wellbeing on vulnerable young people, however, that results from longer term  
33  
34 145 follow-up studies are less clear.

146

35 147 The need to carry out a review of universal school-based interventions  
36  
37 148 specifically within the UK context therefore remains. This is especially pertinent  
38  
39 149 in light of the increasing emphasis from national government on developing  
40  
41 150 CAMHS services within the UK, and the impetus on health and education services  
42  
43 151 to work together in order to improve wellbeing outcomes for children and young  
44  
45 152 people [25, 26, 27].

153

#### 154 **Review aims**

49 155 The present review aims to fill this gap in the literature by focusing on  
50  
51 156 universally-delivered, school-based mental health interventions provided within  
52  
53 157 the UK only. The following questions will be explored:

- 1 158 1. *How effective are universal school-based interventions in the UK that*  
2 159 *promote mental health, emotional wellbeing, or psychological resilience*  
3 160 *and what tools are being used to measure effectiveness?*  
4 161 2. *What methodologies are being applied in UK schools when trialling*  
5 162 *interventions and what is the quality of these studies?*  
6 163 3. *What are the intervention characteristics e.g. delivery, content, target*  
7 164 *audience?*  
8 165 4. *What are the identified barriers in delivering and evaluating universal*  
9 166 *school based interventions?*  
10  
11  
12  
13  
14  
15  
16  
17

## 18 168 **Search Strategy**

19  
20 169 Electronic databases were searched for relevant published research on  
21 170 14<sup>th</sup> April 2016: EMBASE, CINAHL, MEDLINE, PsycINFO, PsycArticles, ASSIA and  
22 171 Psychological and Behavioural Sciences. Selected journals relevant to the area  
23 172 were hand-searched (British Journal of Educational Psychology; British Journal of  
24 173 School Nursing). Previous reviews and relevant papers were reviewed and  
25 174 following consultation with University librarians, the following keyword search  
26 175 terms were used linked with the Boolean operators 'AND' and 'OR' (\* indicates  
27 176 truncation of words):

28 177 Mental Health OR Early Intervention OR Anxi\* OR depress \* OR resilien\* OR  
29 178 emotion\* OR stress\* OR psycho\* OR wellbeing

30 179 AND

31 180 Adolescent OR Adolescen\* OR child\* OR teen\* OR youth OR young pe\* OR pupil\*  
32 181 OR student\* OR learner\* OR scho\*

33 182 AND

34 183 School based OR School based mental health OR School based intervention OR  
35 184 interven\* OR effect\* OR program\* OR initiative OR strateg\* OR evaluat\*

36 185 AND

37 186 United Kingdom OR UK OR Sco\* OR eng\* OR northern ir\* OR wales OR wel\* OR  
38 187 brit\* OR kingdom



188 Study design criteria was wide to allow for the diverse range of  
189 methodologies used to overcome challenges in school-based research. Search  
190 terms were, therefore, chosen primarily to promote sensitivity to the subject  
191 area. A limit date was set from 2000 to April 2016. The early date limit was  
192 selected as this area has been promoted by UK governmental policy largely  
193 within the last decade. Further, detailed appraisal of the previous systematic  
194 reviews in this area found few, if any, discovered studies prior to this date.

### 195 **Study selection**

196 The inclusion criteria were as follows:

- 197 • The intervention was based in a mainstream school environment;
- 198 • Pupils were the recipients of the interventions;
- 199 • The study adopted a pre-post design;
- 200 • The intervention aimed to target mental health and/or emotional  
201 wellbeing;
- 202 • The study used a validated measure to quantitatively evaluate emotional  
203 or mental wellbeing outcomes and reported those outcomes;
- 204 • The study was published between 2000 and April 2016 in a peer reviewed  
205 journal.

206 Exclusion criteria included:

- 207 • The study aims or methodology did not fit the inclusion criteria.
- 208 • Any studies using a non-validated outcome measure as their primary  
209 outcome e.g. Likert scales that were unvalidated.
- 210 • Any studies using a purely qualitative methodology.

### 211 **Details of included and excluded studies (see Figure 1, below.)**

212 Duplicate papers were excluded. Titles were screened to identify only  
213 those that clearly met inclusion criteria. Abstracts were assessed independently  
214 by the authors. Raters met to compare included papers. Where eligibility was  
215 unclear based on the abstract, full articles were retrieved and assessed jointly  
216 by raters. Reference lists of included papers were searched as well as previous  
217 reviews on related topics. Articles citing included articles were also reviewed  
218 and one paper was sourced via this method. Authors of protocol papers were

1 contacted leading to an additional paper being sourced. Experts in the field in  
2  
3 Scotland, England, Northern Ireland and Wales were contacted regarding any  
4  
5 other studies. However, none were eligible for inclusion. Twelve papers were  
6  
7 included in the final review.

8 (Editors: See attached Image)

#### 9 10 *Quality rating of studies*

11  
12 The Downs and Black [28] checklist was used to assess quality. This  
13  
14 checklist assesses internal and external validity, selection bias and study power  
15  
16 over 27 items. This checklist was used due to its utility in assessing studies  
17  
18 relating to public health and its applicability to assess quality in both  
19  
20 randomised and non-randomised studies. Reliability and validity assessment has  
21  
22 found the Quality Index to have high internal consistency, good test-retest  
23  
24 (r = 0.88) and inter-rater (r = 0.75) reliability and good face and criterion validity  
25  
26 (0.90) [28].

27 A sample of papers were assessed by an independent researcher (CA). Any  
28  
29 rating discrepancies were discussed and a shared decision reached. A decision  
30  
31 was taken not to exclude any studies found to be of poor quality as the aim of  
32  
33 this current review was to critique universal school-based interventions whilst  
34  
35 acknowledging that the real-world implementation of such evaluations can be  
36  
37 challenging and, as a result, may reasonably impact study quality.

#### 38 *Data extraction*

39 Due to the heterogeneity of the studies, meta-analysis was not  
40  
41 appropriate. A narrative synthesis was applied to explain the findings of this  
42  
43 review in line with current guidance [29]. Information gathered from the studies  
44  
45 included: study aim, intervention (model, duration, delivery), sample  
46  
47 characteristics, study procedures, outcomes and measures, and results. Issues  
48  
49 relating to the implementation, as well as effectiveness, of interventions were  
50  
51 also noted from those studies commenting on such barriers.

#### 52 **Patient and Public Involvement**

53 No patients or members of the public were directly involved in this piece of  
54  
55 research.  
56

## 250 RESULTS

### 251 Overview of interventions

252 Of the twelve studies sourced, five took place in primary schools [30-34]  
253 and seven took place in secondary schools [35-41]. An overview of study  
254 interventions based in Primary and Secondary schools can be found in Table 1.

#### 255 *Primary school studies:*

256 The five studies within primary school settings evaluated interventions  
257 based on computerised CBT [30]; a teacher led intervention embedded within  
258 the curriculum (e.g. PATHS - 'Promoting Alternative Thinking Strategies' [31]);  
259 manualised anxiety interventions (e.g. a locally developed anxiety intervention,  
260 or the Australian developed 'FRIENDS' programme) delivered by both school staff  
261 (teachers and nurses) and external health staff (e.g. psychologists) [32-34].

#### 262 *Secondary school studies:*

263 Three of the secondary school-based studies trialled interventions based  
264 on Cognitive Behavioural Therapy principles (e.g. UK Resilience programme  
265 (UKRP), Resourceful Adolescent Programme (RAP-UK) [36, 39, 41]) delivered by  
266 school staff [36], educational psychologists [39] and external facilitators [41].  
267 Interventions were also said to include principles of Interpersonal Therapy (RAP-  
268 UK [41]) and behavioural approaches ('TRY' [39]).

269 One study trialled an intervention based on Positive Psychology [35], two  
270 studies trialled a mindfulness-based intervention [38-39] and two trialled locally  
271 developed mental health education sessions delivered to all pupils [37,40].  
272 These interventions were led by trained school teachers [35, 38, 40], and trained  
273 volunteers [37]. All delivered the intervention during Personal Health and Social  
274 Education (PHSE) classes.

### 275 Methodological quality

276 The quality of studies ranged from 'poor' (34% [30]; 37.5% [35]) to  
277 'excellent' (75% [34,37]; 78.1% [36]; 81.3% [41]).

278 Six studies used a randomised controlled pre-post design [30-32, 34, 37,  
279 41]. The remaining were non-randomised pre-post designs and only one did not

280 have a control group [33]. Some studies were particularly weak on their  
 281 description of sample characteristics and representation of the population  
 282 [30,35], reporting of those lost to follow up and accounting for those in the  
 283 analysis [32,35], and the exploring of adverse events, of which only one study  
 284 provided information [41]. Only six studies provided a power calculation [31,  
 285 34,36,37,40,41], most of which had samples sufficiently powered to determine  
 286 an effect (except [37]). The remaining studies did not provide such information.

287 Of the eleven studies employing controls, six used controls from the same  
 288 school in which the intervention was taking place (32,34,36,37,39). All other  
 289 studies recruited controls from different schools.

290 Sample sizes ranged from 13 [30] to 5075 [31]. The age of participants  
 291 ranged from 4 [31] to 16 years old [38,41] with the majority of studies targeting  
 292 the early adolescent age range (9-12 years old) at the end of Primary school or  
 293 at the beginning of Junior / Secondary school [30, 32, 34-37].

294

295

296

**Table 1. Overview of interventions based in Primary and Secondary schools.**

**PRIMARY SCHOOLS**

| <b>Study (Location)</b>                             | <b>Sample</b>                                               | <b>Study aim / hypothesis</b>                                                                | <b>Intervention - Theoretical model and Content</b>                                                                                                                                                                                                                                                                                                          | <b>Intervention - Setting, Structure and Delivery</b>                                                                                    |
|-----------------------------------------------------|-------------------------------------------------------------|----------------------------------------------------------------------------------------------|--------------------------------------------------------------------------------------------------------------------------------------------------------------------------------------------------------------------------------------------------------------------------------------------------------------------------------------------------------------|------------------------------------------------------------------------------------------------------------------------------------------|
| <b>Attwood et al., 2012 [30] (Bristol, England)</b> | 10-12 year old boys from two co-educational schools. (n=13) | A proof of concept study to explore the viability and possible benefits of a cCBT programme. | 'Think, Feel, Do' - Based on CBT principles with a psychoeducation component. Cartoon characters guide users through various activities including: emotional recognition; linking thoughts, feelings and behaviours; identifying and challenging negative thoughts; and problem solving. Involves quizzes, practical exercises, videos, music and animation. | Six x 45min sessions delivered via an interactive multimedia CD-ROM.<br><br>Took place within the school, facilitated by the researcher. |

|                                                                                                           |                                                             |                                                                                                                                              |                                                                                                                                                                                                                                                                                                                                                                                                       |                                                                                                                                                                                                               |
|-----------------------------------------------------------------------------------------------------------|-------------------------------------------------------------|----------------------------------------------------------------------------------------------------------------------------------------------|-------------------------------------------------------------------------------------------------------------------------------------------------------------------------------------------------------------------------------------------------------------------------------------------------------------------------------------------------------------------------------------------------------|---------------------------------------------------------------------------------------------------------------------------------------------------------------------------------------------------------------|
| <p><b>Berry et al., 2016 [31]</b></p> <p><b>(Birmingham, England)</b></p>                                 | <p>4-6 year old pupils (n=5075; 56 x schools)</p>           | <p>Test the effectiveness and cost-effectiveness of the intervention to reduce children's level of behavioural and emotional difficulty.</p> | <p>'PATHS' (Promoting alternative thinking strategies). Aims to improve skills in five areas: self-awareness, managing feelings, motivation, empathy and social skills. Lessons are developmentally sequenced and focus on techniques for self-control; emotional and interpersonal understanding steps for solving interpersonal problems; positive self-esteem and improved peer relationships.</p> | <p>44 lessons in Year 1; 47 x lessons in Year 2. Delivered by trained teachers within classroom.</p> <p>Manual provides teacher scripts, pictures, activity sheets, photos, posters, and home activities.</p> |
| <p><b>Collins et al., 2013 [32]</b></p> <p><b>(South Lanarkshire, Scotland)</b></p>                       | <p>9-10 year old pupils (n=317; 9 schools; 18 classes).</p> | <p>To explore if anxiety &amp; coping showed improvement post-intervention, and test effects of delivery.</p>                                | <p>'Lessons for living: Think Well, Do Well'. CBT based intervention to develop coping skills. A series of skills practice using interactive teaching methods. Children are guided to recognise emotional symptoms, reduce avoidant coping strategies, and focus on proactive problems solving and support-seeking.</p>                                                                               | <p>Ten lessons delivered by a psychologist (n=103) &amp; teacher (n=79) during PSE. Teachers provided with intervention manual following one-day training.</p>                                                |
| <p><b>Stallard et al., 2007 [33]</b></p> <p><b>(Bath &amp; N.E. Somerset, England)</b></p>                | <p>9-10 year old pupils (n=106; 3 schools; 4 classes).</p>  | <p>To evaluate an Australian-originated intervention in the UK; test delivery by school nurses.</p>                                          | <p>'FRIENDS - Feelings, Relax, I can do it, Explore solutions, Now reward, Don't forget practice, Smile'. Based on CBT principles it teaches children practice skills to: identify their anxious feelings and learn to relax; identify unhelpful thoughts and replace them with helpful thoughts; face and overcome problems and challenges.</p>                                                      | <p>Ten sessions delivered by school nurses who attended 2-day training. Lessons comprise group work, workbooks, role play and games. Parents invited to pre-intervention session.</p>                         |
| <p><b>Stallard et al., 2014 [34]</b></p> <p><b>(Bath, N.E. Somerset, Swindon, Wiltshire, England)</b></p> | <p>9-10 year old pupils (n=1448; 45 x schools)</p>          | <p>To assess the effectiveness of FRIENDS delivered by both health and school professionals on anxiety prevention.</p>                       | <p>As above (Stallard et al., 2007)</p>                                                                                                                                                                                                                                                                                                                                                               | <p>Nine x 60 min lessons delivered to whole classes. Health-led group: two trained facilitators. Teacher-led group: led by class teacher. All attended 2-day training.</p>                                    |

## SECONDARY SCHOOLS

| Study (Location)                                                                      | Sample                                                                  | Study aim / hypothesis                                                                                                                                                                | Intervention - Theoretical model and Content                                                                                                                                                                                                                                                                                                         | Intervention - Setting, Structure & Delivery                                                                                                                       |
|---------------------------------------------------------------------------------------|-------------------------------------------------------------------------|---------------------------------------------------------------------------------------------------------------------------------------------------------------------------------------|------------------------------------------------------------------------------------------------------------------------------------------------------------------------------------------------------------------------------------------------------------------------------------------------------------------------------------------------------|--------------------------------------------------------------------------------------------------------------------------------------------------------------------|
| <b>Boniwell et al., 2016 [35]</b><br><br>(S.E. London, England)                       | 11-12 year old pupils (n=296; 2 x Haberdashers' Aske's Fed. of Schools) | To test the efficacy of a new school programme for the promotion of happiness and wellbeing skills.                                                                                   | 'Personal Wellbeing Lesson Curriculum'. Covers the 'scientific basis of happiness' focusing specifically on two core aspects: positive emotions / experiences and positive relationships. Based on theoretical constructs from wellbeing research and positive psychology e.g. 'three good things', forgiveness letter, gratitude visit.             | Eighteen bi-weekly 50 min scripted lessons delivered to 8 classes by 4 teachers who attended 5-day training. Provided with lesson plans, PowerPoints and handouts. |
| <b>Challen et al., 2014 [36]</b><br><br>(Greater London, N.W. England & N.E. England) | 11-12 year old pupils (n=2844; 16 x schools; 3 x L.As)                  | To evaluate a UK version of Penn Resiliency Program (PRP). Hypothesised high completion rates and reduction of depression symptoms.                                                   | 'UK Resiliency Program'. Aims to build resilience and promote realistic thinking and adaptive coping, based on Ellis's 'Activating event-belief consequences model'. Teaches cognitive behavioural and social problem-solving skills; encourages accurate appraisal of situations; and assertiveness, negotiation and relaxation skills.             | An 18-hour program delivered within the timetable at the teacher's discretion. Delivered by school staff who attended 10-day training in the US.                   |
| <b>Chisholm et al., 2016 [37]</b><br><br>(Birmingham, England)                        | 12-13 year old pupils (n=769; 6 x schools).                             | To test whether contact with an individual with MH diagnosis plus education is more effective in reducing stigma, improving MH literacy and promoting wellbeing than education alone. | 'Schoolspace'. A 10-module MH intervention designed by study researchers covering topics such as stress, depression, psychosis, different ways of thinking and a drama workshop. The 'contact' group had an individual facilitating who was a MH service user and had a diagnosis (e.g. psychosis, BPD) - this was revealed halfway through the day. | A one-day intervention within the school led by NHS staff, trained volunteers and MH service users.                                                                |
| <b>Kuyken et al., 2013 [38]</b><br><br>(England)                                      | 12-16 year old pupils (n= 522; 12 x                                     | To investigate the acceptability of a mindfulness programme for teachers and                                                                                                          | 'Mindfulness in Schools Program' (MiSP). Involved learning to direct attention to immediate experience with open-minded curiosity and acceptance. Skills were learned                                                                                                                                                                                | Nine weekly scripted lessons delivered as part of the curriculum, or at lunchtime by 7                                                                             |



|    |                     |           |                    |                                   |                   |
|----|---------------------|-----------|--------------------|-----------------------------------|-------------------|
| 1  |                     | schools). | students; test     | through practice sessions and     | teachers trained  |
| 2  |                     |           | efficacy of        | everyday application.             | and approved to   |
| 3  |                     |           | programme on       | Mindfulness practice used to      | deliver the MiSP  |
| 4  |                     |           | MH and             | work with mental states and       | curriculum.       |
| 5  |                     |           | wellbeing.         | everyday stressors to cultivate   |                   |
| 6  |                     |           |                    | wellbeing and promote mental      |                   |
| 7  |                     |           |                    | health.                           |                   |
| 8  |                     |           |                    |                                   |                   |
| 9  |                     |           |                    |                                   |                   |
| 10 | <b>Rice et al.,</b> | 13-14     | To compare         | 'TRY' (Thinking about Reward      | Eight weekly      |
| 11 | <b>2015 [39]</b>    | year old  | three types of     | in Young People). Aimed to        | manualised        |
| 12 | <b>(S.E.</b>        | pupils    | intervention       | enhance reward processing         | sessions of each  |
| 13 | <b>England)</b>     | (n=256;   | which may          | through actively selecting        | intervention      |
| 14 |                     | 3 x       | prevent            | activities to lift mood.          | delivered within  |
| 15 |                     | schools). | adolescent         | CBT. Aimed to change negative     | 50-minute PHSE    |
| 16 |                     |           | depression and     | thinking patterns by              | lessons by        |
| 17 |                     |           | explore            | encouraging evaluation of         | Educational       |
| 18 |                     |           | cognitive          | thoughts.                         | Psychologists who |
| 19 |                     |           | mechanisms         | 'MBCT' (Mindfulness Based         | attended regular  |
| 20 |                     |           | involved with      | Cognitive Therapy). Aimed to      | supervision.      |
| 21 |                     |           | each.              | promote awareness and             |                   |
| 22 |                     |           |                    | acceptance of thoughts and to     |                   |
| 23 |                     |           |                    | develop regulation of attention   |                   |
| 24 |                     |           |                    | through guided meditation.        |                   |
| 25 |                     |           |                    | Psychoeducation regarding         |                   |
| 26 |                     |           |                    | depression was provided to all    |                   |
| 27 |                     |           |                    | groups.                           |                   |
| 28 |                     |           |                    |                                   |                   |
| 29 |                     |           |                    |                                   |                   |
| 30 |                     |           |                    |                                   |                   |
| 31 | <b>Naylor et</b>    | 14-15     | To explore         | Mental health lessons. Topics     | Six 50 min        |
| 32 | <b>al. 2009</b>     | year old  | whether            | included: stress, learning        | weekly lessons    |
| 33 | <b>[40]</b>         | pupils    | teaching           | disability, depression, suicide / | delivered by 7    |
| 34 | <b>(Greater</b>     | (n=416;   | adolescents        | self-harm, eating disorders,      | group tutors      |
| 35 | <b>London,</b>      | 2 x       | about mental       | and bullying using methods        | from pastoral     |
| 36 | <b>England)</b>     | schools). | health would       | such as discussion, role playing  | care who          |
| 37 |                     |           | result in gains in | and internet searching.           | attended a 1-day  |
| 38 |                     |           | knowledge and      |                                   | training from     |
| 39 |                     |           | empathy.           |                                   | researchers.      |
| 40 |                     |           |                    |                                   |                   |
| 41 |                     |           |                    |                                   |                   |
| 42 | <b>Stallard et</b>  | 12-16     | To assess effects  | 'RAP-UK: Resourceful              | Nine 50-60 min    |
| 43 | <b>al., 2013</b>    | year old  | of classroom       | Adolescent Programme'. A          | manualised        |
| 44 | <b>[41]</b>         | pupils    | based CBT on       | depression prevention             | lessons delivered |
| 45 | <b>(Bath, N.E.</b>  | (n=5030;  | symptoms of        | programme based on CBT and        | within the PSHE   |
| 46 | <b>Somerset,</b>    | 8 x       | depression and     | interpersonal therapy             | curriculum by     |
| 47 | <b>Bristol,</b>     | schools,  | in relation to     | principles adapted to fit the     | two trained       |
| 48 | <b>Wiltshire,</b>   | 28 x      | other aspects of   | UK curriculum. Key elements       | facilitators      |
| 49 | <b>Notting-</b>     | year      | psychological      | include: personal strengths,      | external to the   |
| 50 | <b>hamshire,</b>    | groups).  | wellbeing and      | helpful thinking, keeping calm,   | school.           |
| 51 | <b>England)</b>     |           | specific           | problem solving, support          |                   |
| 52 |                     |           | demographic        | networks and keeping the          | Two booster       |
| 53 |                     |           | sub-groups.        | peace. Students complete          | sessions offered  |
| 54 |                     |           |                    | workbooks as they progress.       | to schools at 6   |
| 55 |                     |           |                    |                                   | month follow up.  |
| 56 |                     |           |                    |                                   |                   |

## 297 **EFFECTIVENESS OF INTERVENTIONS**

298 An overview of study characteristics and outcomes can be found in Tables 2 and  
299 3.

### 300 **Data collection and measurement**

301 Studies varied widely in their use of measures. Measures used to rate  
302 depressive symptoms included the Children's Depression Inventory (CDI) [36],  
303 the Short Mood and Feelings Questionnaire (SMFQ) [39, 41] and the Center for  
304 Epidemiological Studies - Depression Scale (CES-D) [38]. Measures used to rate  
305 anxiety included the Revised Children's Anxiety and Depression Scale (RCADS)  
306 [34, 41], Revised Children's Manifest Anxiety Scale (RCMAS) [36], Penn State  
307 Worry questionnaire [41] and the Spence anxiety scale [30,32,33]. Measures used  
308 to capture different methods of coping related to symptoms of anxiety or  
309 depression included: Children's Automatic Thoughts Scale (CATS) [41], Coping  
310 Strategy Indicator (CSI) [32], Sentence Completion for Events in the Past Test  
311 (SCEPT) [39], and Perceived Stress Scale (PSS) [38]. Two studies used measures  
312 related specifically to wellbeing or resilience: Warwick-Edinburgh Mental  
313 Wellbeing Scale (WEMWBS) [38] and the Resilience Scale [37] and others used  
314 measures related to self-esteem [33,34,41] and life satisfaction [35]. The  
315 Strength and Difficulties Questionnaire (SDQ) was the most commonly used  
316 measure said to rate behavioural, emotional difficulties and overall functioning  
317 and either the child, parent or teacher version was used in six of the twelve  
318 studies [30,31,33,36,37,40]. Studies varied according to the length of follow up  
319 ranging from 4 weeks [37], to 2 years [41]. Four of the twelve studies sought to  
320 obtain qualitative, as well as quantitative data [30,35,37,41]. However, it was  
321 beyond the scope of this paper to comment on qualitative findings.

322 Due to the heterogeneity of studies, the effectiveness of each  
323 intervention approach will be discussed in turn. Overall, results suggested a  
324 trend whereby higher quality studies reported less positive effects.

325 **Studies trialling bespoke mental health education programmes (n=3;**  
326 **[40,37,35] - all in secondary schools).**

327 Two studies found small ( $d=0.11-0.22$ ) but significant improvements in  
328 total and subscale SDQ scores for those that received mental health education.



1 329 However, of those, it is noteworthy that Chisholm et al. [37] did not employ a  
2 330 non-intervention condition. Boniwell et al. [35] trialled a bespoke intervention  
3 331 based on Positive Psychology principles and found a decrease in outcomes of life  
4 332 satisfaction and an increase in negative affect for both groups. However, this  
5 333 was less so for the intervention group ( $d=-0.24$  compared to  $d=-0.79$ ) which was  
6 334 interpreted as the intervention having a 'buffering effect' at a time of stress for  
7 335 the pupils.

12 336 **Studies trialling CBT-based interventions** [ $n= 8$ ; 30-34,36,39,41]. These are  
13 337 described by setting (Primary and then Secondary).

#### 16 338 *Primary schools*

19 339 All primary-school based studies trialled interventions pertaining to  
20 340 altering thinking styles based on CBT principles. Four studies, three of which  
21 341 employed a control arm, reported statistically positive outcomes on anxiety-  
22 342 related measures following interventions including FRIENDS [33,34], 'Think Feel  
23 343 Do' [30] and locally developed CBT programmes [32] with larger effects for  
24 344 those in 'high risk' groups ( $d=-1.26$ ; [33] - no control arm). Methodological issues  
25 345 such as a small sample size and significant group differences at baseline  
26 346 ( $n=13$ ;[30]), failure to include those lost to follow-up in analysis [32], lack of  
27 347 controls [33], and small effect sizes for universal samples ( $d=0.01 - 0.2$ ) [34]  
28 348 should be noted when taking inference from those results. Mixed results were  
29 349 found in relation to delivery, with stronger effects found in interventions led by  
30 350 health professionals ( $d=0.2$ ) versus school staff ( $d=0.02$ ) [34], or no difference  
31 351 between psychologist or teacher-led interventions [32]. A sufficiently powered,  
32 352 good-quality study evaluating the use of PATHS within the curriculum found few,  
33 353 small significant results ( $d = 0.06 - 0.14$ ; teacher-rated intervention measure) at  
34 354 12-month follow up, and no effects on any measure at 24-month follow up [31].

#### 35 355 *Secondary schools*

36 356 Fewer significant outcomes were found in trials based within secondary  
37 357 school populations. Small ( $d=0.093$ ), but short-lived positive outcomes were  
38 358 found on the CDI for those in the UKRP intervention [36]. Mixed results were  
39 359 found for those in the UK-RAP intervention, with results indicating some  
40 360 beneficial and also potentially negative outcomes [41] although all with small

1 361 effect sizes. Both were high quality, longitudinal, well-powered studies  
2 362 employing robust methodologies. Further, no effects were found in the CBT  
3 363 group when compared with as-usual controls or other treatments in a smaller  
4 364 study looking at mechanisms of change [39]. In the same study, a behavioural  
5 365 intervention (TRY) was found to have positive effects on reward-seeking  
6 366 behaviour and SMFQ measure ( $d=-0.8$ ) when compared with other treatments;  
7 367 however, this finding was not confirmed when compared with PHSE-as-usual  
8 368 controls.

15 369 **Studies using mindfulness-based interventions** ( $n=2$ ; [38,39] - both in  
16 370 secondary schools).

19 371 Positive outcomes were found in a feasibility study evaluating a  
20 372 mindfulness-based intervention [38] which yielded statistically significant,  
21 373 modest effects on both depression (CES-D:  $d=-0.24$ ) and wellbeing (WEMWBS:  
22 374  $d=0.15$ ) measures. Due to small sample sizes this study was likely to be  
23 375 underpowered; however, outcomes were sustained at 3 months follow up and  
24 376 were associated with greater mindfulness practice. No significant outcomes were  
25 377 found in a smaller study trialling MBCT on measures of mood (SMFQ) or reward-  
26 378 seeking [39].

32 379

Table 2. Design and outcome characteristics of primary-school based studies.

| Study (% quality rating)                        | Study Design                                                                                                                                                                       | Measures                                                                                                                                              | Follow-up                                                                  | Effects / Outcomes                                                                                                                                                                                                                                                                                                                                                         |
|-------------------------------------------------|------------------------------------------------------------------------------------------------------------------------------------------------------------------------------------|-------------------------------------------------------------------------------------------------------------------------------------------------------|----------------------------------------------------------------------------|----------------------------------------------------------------------------------------------------------------------------------------------------------------------------------------------------------------------------------------------------------------------------------------------------------------------------------------------------------------------------|
| <b>Attwood et al., 2012</b><br>[30]<br>(34%)    | Randomised pre-post intervention evaluation using opportunistic sample. No blinding or randomisation procedure reported. 'cCBT' (n=6) x control group (n=7).                       | <ul style="list-style-type: none"> <li>• SCAS - Parent &amp; Child version.</li> <li>• SDQ - Parent version.</li> <li>• Focus groups (n=8)</li> </ul> | Baseline; 6-weeks post intervention.                                       | Significant reduction in SCAS-C 'social' (d=0.49*) and 'general anxiety' (d=0.48*) subscales (NB: Intervention group significantly higher on SCAS at baseline). No effects on parent rated measures.                                                                                                                                                                       |
| <b>Berry et al., 2016</b><br>[31]<br>(68.8%)    | Randomised controlled trial; web randomisation system.<br>29 schools 'PATHS' intervention x 27 schools WL Control. <sup>1</sup>                                                    | <ul style="list-style-type: none"> <li>• SDQ - teacher version.</li> <li>• PATHS teacher rating scale (PTRS).</li> <li>• T-POT.</li> </ul>            | Baseline; 12 month post-intervention; 24 month post intervention.          | No differences on SDQ at 12-month F-up. Some significant results on subscales of PTRS at 12 month f-up (Social competence: d=0.09*; Aggression: d=0.14*; Inattention: d=-0.06*; Peer relations: -0.10*). Not maintained at 24 month follow up.                                                                                                                             |
| <b>Collins et al., 2013</b><br>[32]<br>(46.9%)  | Randomised 3 x 3 mixed design. No randomisation procedure reported.<br>Psychologist led anxiety intervention (n=103) x Teacher led anxiety intervention (n=79) x Controls (n=135). | <ul style="list-style-type: none"> <li>• CSI</li> <li>• SCAS -Child version administered by teachers.</li> </ul>                                      | Baseline; post-intervention; (within 3 weeks of end); 6 months follow up.  | Improvement in psychologist-led and teacher-led groups on SCAS-C (d=0.41*; d=0.31*) & CSI 'Avoidance' (d=0.31*; d=0.31*) and 'problem solving' (d=-0.66*; d=0.52*) subscales. No difference between psychologist or teacher-led groups. SCAS-C outcomes maintained at 6 months follow up (d=0.39*; d=0.39*). NB: Those lost to follow up (n=155) not included in analysis. |
| <b>Stallard et al., 2007</b><br>[33]<br>(43.4%) | Pre- post evaluation of pupils (n=106) from 3 schools taking part in the FRIENDS intervention.<br>No controls employed.                                                            | <ul style="list-style-type: none"> <li>• SCAS-Child version.</li> <li>• CFSEQ.</li> </ul>                                                             | 'T1': 6 month prior; 'T2': prior to intervention; 'T3': 3-month follow-up. | Improvements in SCAS (d=-0.50*) and CFSEQ (d=0.58*) from T1 to T3 for whole sample; not between T2 and T3 (across intervention). Improvements on both measures (d=-1.26*; d=-1.27*) for 'high risk' group between T2-T3.                                                                                                                                                   |

|                                                    |                                                                                                                                                                             |                                                                                                                                                                                                                                                                                                        |                                                     |                                                                                                                                                                                                                                                                                                    |
|----------------------------------------------------|-----------------------------------------------------------------------------------------------------------------------------------------------------------------------------|--------------------------------------------------------------------------------------------------------------------------------------------------------------------------------------------------------------------------------------------------------------------------------------------------------|-----------------------------------------------------|----------------------------------------------------------------------------------------------------------------------------------------------------------------------------------------------------------------------------------------------------------------------------------------------------|
| <p><b>Stallard et al., 2014 [34]</b><br/>(75%)</p> | <p>Cluster randomised controlled trial randomised through computer tool.</p> <p>Health-led FRIENDS (n=489) x School led FRIENDS (n=472) x Controls (n=401).<sup>1</sup></p> | <ul style="list-style-type: none"> <li>• RCADS 30 - child &amp; parent.</li> <li>• Penn State Worry Questionnaire.</li> <li>• RSES.</li> <li>• Bully / victim questionnaire.</li> <li>• Subjective wellbeing assessment.</li> <li>• SDQ- Parent version; teachers completed 'Impact scale'.</li> </ul> | <p>Baseline;6 months f-up; 12 months follow-up.</p> | <p>Improvement on total RCADS (d=0.20*) and social (d=-0.09*) &amp; general anxiety subscales (d=-0.20*) - not depression. Smaller effect sizes in school led group (d=0.02*; d=0.11*; d=0.01*);. No statistical improvements on secondary outcome measures or teacher / parent rating scales.</p> |
|----------------------------------------------------|-----------------------------------------------------------------------------------------------------------------------------------------------------------------------------|--------------------------------------------------------------------------------------------------------------------------------------------------------------------------------------------------------------------------------------------------------------------------------------------------------|-----------------------------------------------------|----------------------------------------------------------------------------------------------------------------------------------------------------------------------------------------------------------------------------------------------------------------------------------------------------|

<sup>1</sup> Study sufficiently powered to detect change. <sup>2</sup> Power calculation provided but proportion lost to follow up (>15%) reduced sample required for adequate power. \*Significant at p<0.5 level.

SCAS = Spence Children's Anxiety Scale; SDQ – Strength and Difficulties Questionnaire; PATHS = Promoting Alternative Thinking Strategies; PTRS = Paths teacher rating scale; T-POT = Teacher Pupil Observation Tool; CFSEQ = Culture-free Self-esteem questionnaire; RCADS = Revised Child Anxiety and Depression Scale; CSI = Coping Strategy Indicator

Table 3. Design and outcome characteristics of Secondary school-based studies.

| Study (% quality rating)                       | Study Design                                                                                                                                                                                            | Measures                                                                                                                                                                                                                                   | Follow-up                                                                           | Effects / outcomes                                                                                                                                                                                                                                                                                                                                                            |
|------------------------------------------------|---------------------------------------------------------------------------------------------------------------------------------------------------------------------------------------------------------|--------------------------------------------------------------------------------------------------------------------------------------------------------------------------------------------------------------------------------------------|-------------------------------------------------------------------------------------|-------------------------------------------------------------------------------------------------------------------------------------------------------------------------------------------------------------------------------------------------------------------------------------------------------------------------------------------------------------------------------|
| <b>Boniwell et al. 2016</b><br>[35]<br>(37.5%) | Non-randomised control group pre-post design.<br><br>'Personal Wellbeing' intervention group (n=211) x control group (n=85).                                                                            | <ul style="list-style-type: none"> <li>• SLSS.</li> <li>• MSLSS.</li> <li>• PNASC.</li> <li>• Qualitative interviews.</li> </ul>                                                                                                           | Baseline; Post-intervention (10 month f-up)                                         | No significant improvement on SLSS or MSLSS. Decrease in 'satisfaction with school'(d=0.4*) and 'friends' (d=-0.17) scores for whole sample. Decrease in positive affect for both intervention and control groups (d=-0.24*; -0.79*); increase in negative affect (d=0.54*) for control group. NB: Those lost to follow up (n=103) not accounted for in analysis.             |
| <b>Challen et al. 2014</b><br>[36]<br>(78.1%)  | Non-randomised pragmatic controlled trial.<br><br>UKRP intervention (n=1016) group x Control (n=1894) group. <sup>1</sup>                                                                               | <ul style="list-style-type: none"> <li>• CDI.</li> <li>• RCMAS.</li> <li>• SDQ.</li> </ul>                                                                                                                                                 | Baseline; post intervention (4-9 months); 1 yr follow-up; 2 year follow-up.         | Small significant impact on CDI post-intervention (d=0.093*); not maintained at 1 or 2 years follow up. No significant effects on RCMAS or SDQ scores.                                                                                                                                                                                                                        |
| <b>Chisholm et al. 2016</b><br>[37]<br>(75%)   | Pragmatic cluster randomised controlled trail, randomised by independent researcher.<br><br>'Contact and MH Education' (n=354) group x MH Education (n=303) group. <sup>2</sup> No 'as usual' controls. | <ul style="list-style-type: none"> <li>• RIBS (not validated for adolescents).</li> <li>• MAKS (not validated for adolescents).</li> <li>• SDQ.</li> <li>• Resilience scale.</li> <li>• Helpseeking Q.</li> <li>• Focus groups.</li> </ul> | Baseline - 2 weeks prior to intervention day;<br><br>2 weeks post-intervention day. | Statistical sig. improvements on several scales post intervention day for both groups - 'contact and education' and 'education only': Attitudinal based stigma (d=0.23*; d=0.25*), knowledge based stigma (d=0.54*; d=0.59*), mental health literacy (d=0.05; d=0.13*); emotional wellbeing (d=0.16*; d=0.14*), and resilience (d=0.07; d=0.22*). No change in 'helpseeking'. |

<sup>1</sup> Study sufficiently powered to detect change.

<sup>2</sup> Power calculation provided but proportion lost to follow up (>15%) reduced sample required for adequate power. \*statistically significant at p < 0.05 level.

SLSS – Student’s Life Satisfaction Scale; MSLSS = Multidimensional Students Life Satisfactions Scale; PNASC = Positive and Negative Affect Schedule for Children; CDI = Children’s Depression Inventory; RCMAS = Revised Children’s Manifest Anxiety Scale; SDQ = Strength and Difficulties Questionnaires; RIBS = Reported and Intended Behaviour Scale; MAKS = Mental Health Knowledge Schedule; WEMWBS = Warwick Edinburgh Mental Wellbeing Scale;

|                                                   |                                                                                                                                                                                     |                                                                                                                                                                                                                           |                                                                                  |                                                                                                                                                                                                                                                                                                                                                                                                                                                                       |
|---------------------------------------------------|-------------------------------------------------------------------------------------------------------------------------------------------------------------------------------------|---------------------------------------------------------------------------------------------------------------------------------------------------------------------------------------------------------------------------|----------------------------------------------------------------------------------|-----------------------------------------------------------------------------------------------------------------------------------------------------------------------------------------------------------------------------------------------------------------------------------------------------------------------------------------------------------------------------------------------------------------------------------------------------------------------|
| <p><b>Kuyken et al. 2013 [38]</b><br/>(59%)</p>   | <p>Non-randomised controlled feasibility study. MiSP intervention group (n=256) x control (n=266).</p>                                                                              | <ul style="list-style-type: none"> <li>• WEMWBS.</li> <li>• PSS.</li> <li>• CES-D.</li> <li>• Mindfulness practice.</li> </ul>                                                                                            | <p>Baseline; Post-intervention (9 weeks); 3 month follow-up.</p>                 | <p>Lower depression scores post-intervention (d=-0.29*). Improvement on all measures at 3 month follow-up (WEMWBS: d=0.15*; PSS: d=-0.09*; CES-D: d=-0.24*). Mindfulness practice significantly associated with greater gains across all measures (unable to calculate E.S.).</p>                                                                                                                                                                                     |
| <p><b>Rice et al. 2015 [39]</b><br/>(50%)</p>     | <p>Non-randomised longitudinal design with three intervention conditions.<br/><br/>TRY intervention group (n=50) x CBT group (n=53) x MBCT group (n=54) x PHSE controls (n=99).</p> | <ul style="list-style-type: none"> <li>• SMFQ.</li> <li>• CGT to measure reward seeking.</li> <li>• DASC and corresponding response time.</li> <li>• SCEPT to measure overgeneral memory.</li> </ul>                      | <p>Baseline; 9 week follow-up.</p>                                               | <p>Statistical sig. changes in reward seeking in TRY group (d=0.12*); no change after CBT or MBCT. No statistically significant decrease in SMFQ across groups compared to PHSE controls. When comparing treatment groups only, TRY showed statistical reduction in SMFQ when compared with MBCT and CBT (d=-0.8*); reward-seeking moderated reductions in SMFQs scores (d=1.62*).</p>                                                                                |
| <p><b>Naylor et al. 2009 [40]</b><br/>(56.3%)</p> | <p>Non-randomised pre-post control group study. MH intervention group (n=175) x Control group (n=242).<sup>1</sup></p>                                                              | <ul style="list-style-type: none"> <li>• Mental Health Questionnaire (unvalidated).</li> <li>• SDQ.</li> </ul>                                                                                                            | <p>Baseline (1 week before intervention); 6 months post-intervention.</p>        | <p>Improvement in MHQ with regards to awareness of depression causes (d=0.21*) and bullying (d=0.31*). Changes in specific SDQ subscales: 'conduct' (d=0.22*) and 'prosocial' (d=0.11*) but not on total difficulties.</p>                                                                                                                                                                                                                                            |
| <p><b>Stallard et al. 2013</b><br/>(81.3%)</p>    | <p>Cluster randomised controlled trial, randomised by computer.<br/><br/>UK-RAP intervention group (n=1753) x Attention controls (n=1673) x PHSE controls (n=1604)<sup>1</sup></p>  | <ul style="list-style-type: none"> <li>• SMFQ.</li> <li>• CATS.</li> <li>• RSES.</li> <li>• RCADS.</li> <li>• School connectedness.</li> <li>• Attachment Questionnaire.</li> <li>• European Quality of Life-5</li> </ul> | <p>Screening - SMFQ only; Baseline; 6 months follow-up; 12 months follow-up.</p> | <p>No significant effect on SMFQ at 12 months follow-up. Some effect of intervention on bullying status at 12 months, and Cannabis use at 6mo and 12 months follow-up. Intervention less useful than usual PHSE or attention controls for panic; less useful than usual PHSE on CATS 'personal failure' and general anxiety. Signs of benefits and harm of intervention found, all reported to be small effect sizes (data unavailable to calculate effect size).</p> |

PSS = Perceived Stress Scale; CES-D = Center for Epidemiologic Studies Depression Scale; SMFQ = Short Mood and Feelings Questionnaire; CGT = Cambridge Gambling Task; DASC = Dysfunctional Attitudes Scale for Children; SCEPT = Sentence completion for Events from the Past (SCEPT); CATS = Children's Automatic Thoughts Scale; RSES = Rosenberg Self Esteem Scale.

1  
2  
3  
4  
5  
6  
7  
8  
9  
10  
11  
12  
13  
14  
15  
16  
17  
18  
19  
20  
21  
22  
23  
24  
25  
26  
27  
28  
29  
30  
31  
32  
33  
34  
35  
36  
37  
38  
39  
40  
41  
42  
43  
44  
45  
46  
47

|  |                    |
|--|--------------------|
|  | <i>dimensions.</i> |
|--|--------------------|

<sup>1</sup> Study sufficiently powered to detect change. <sup>2</sup> Power calculation provided but proportion lost to follow up (>15%) reduced sample required for adequate power. \*Significant at p<0.5 level.

Peer review only

## 380 Implementation Issues

381 Common issues relating to implementation were found across all studies.

### 382 *Fidelity*

383 Fidelity to intervention delivery was highlighted as an issue in terms of both  
384 measurement and outcome. Studies used self-rated fidelity methods [32], external  
385 fidelity ratings on a proportion of sessions [31,34,36,37,41] or no fidelity rating  
386 methods reported at all. Studies commented variably on the possible effect of  
387 fidelity and ‘treatment dosage’ on outcomes. In Stallard et al.’s [37] study the  
388 health-led condition with 100% fidelity (i.e. administered all pieces of homework  
389 and activity tasks), was associated with significantly better outcomes than the  
390 school-led group who achieved 60-80% fidelity. ‘High quality’ workshops were also  
391 found to be related to greater declines in CDI measures [36]. Conversely, Berry et  
392 al. [31] found that fidelity (when applying an arbitrary ‘80%’ rate of ‘high’ fidelity)  
393 was not found to be related to outcome.

### 394 *Attrition*

395 Investment from schools was raised as an issue as demonstrated by school  
396 participation and attrition [31,41] and failure to administer follow up measures as  
397 per study procedures [32,35]. All studies, with the exception of Stallard et al. [41]  
398 provided little information about school or participant characteristics of those who  
399 dropped out. This confounding factor may have positively biased results. For  
400 instance, in Kuyken et al’s [38] study, teachers who delivered the mindfulness  
401 intervention had been invested in the intervention for approximately 2 years  
402 before the beginning of the study and attended regular supervision, demonstrating  
403 good motivation throughout the study which found positive outcomes.

### 404 *Costs*

405 Two studies actively explored health economic costs involved [31,41]. Cost-  
406 effectiveness was not calculated by Berry et al. [31] due to lack of impact, and  
407 Stallard et al. [41] concluded that the intervention was not cost-effective. Of  
408 note, both studies may have sustained high costs due to employing external  
409 facilitators to lead the intervention rather than teachers [41] and hiring ‘coach  
410 consultants’ to monitor delivery [31].



1  
2  
3 411 **DISCUSSION**

4  
5 412 This review aimed to explore the effectiveness and study quality of  
6 413 universally delivered school-based interventions within the UK which aim to  
7 414 promote mental and emotional wellbeing, or prevent mental ill health. Several  
8 415 clear conclusions can be drawn from this review, while other issues require further  
9 416 clarity from future research.

10  
11  
12  
13  
14 417

15  
16 418 ***How effective are universal school-based interventions in the UK that promote***  
17  
18 419 ***mental health, emotional wellbeing, or psychological resilience?***

19  
20 420 Based on the studies included in this review, the effectiveness of universal  
21 421 school based interventions remains mixed, and at best, modest. Where there were  
22 422 several positive outcomes, effect sizes were small and methodological issues  
23 423 rendered many results to be interpreted with caution.

24  
25  
26  
27 424 Studies based in Primary schools seemed to find more encouraging results  
28 425 from CBT-based interventions on measures of anxiety, although most studies had  
29 426 methodological limitations relating to use of appropriate controls, and failure to  
30 427 include those lost to follow up in analysis. Positive results tended to fall in the  
31 428 older age range of Primary school pupils (9-12 years old).

32  
33  
34  
35  
36 429 Within the Secondary school population, the most positive results were  
37 430 obtained when delivering mental health education sessions, behavioural or  
38 431 mindfulness interventions. Two high powered, good quality studies evaluating CBT  
39 432 based interventions within secondary populations found few significant results and  
40 433 one study indicated possible detrimental impacts of the intervention compared to  
41 434 controls, although any effect sizes related to these findings were small.

42  
43  
44  
45  
46 435 It is curious that studies fail to detect promising effects in the older,  
47 436 secondary school, population. It could be argued that a 2 year follow-up is not  
48 437 sufficient to truly detect change or prevention during the developmentally-  
49 438 sensitive time that is adolescence. Arguably, the demands placed on adolescents  
50 439 merely change in nature rather than impact over time. Adolescent psychosocial  
51 440 development [42] is particularly vulnerable as individuals are required to manage  
52 441 academic demands as they progress through their school career, navigate

1  
2  
3 442 friendships, seek to develop self-identities and deal with the physiological changes  
4 443 that occur as they transition through puberty. It could be that the existence of  
5 444 such pervasive and fluctuating stressors juxtaposed with measurement issues,  
6 445 discussed below, contribute to the failure to detect significant results in secondary  
7 446 school populations. Or, that such interventions simply have less impact for this  
8 447 population.

9  
10  
11  
12  
13 448

14  
15 449 ***What methodologies are being applied in UK schools when trialling***  
16 450 ***interventions and what is the quality of these studies?***

17  
18  
19 451 Methodological issues were predominant in this review. Only four of the  
20 452 studies were of 'excellent' quality and findings indicated a trend towards higher  
21 453 quality papers finding fewer positive results. Studies were weakened largely due to  
22 454 their lack of randomisation and blinding of researchers, and small sample sizes  
23 455 which likely rendered them underpowered to detect true effects.

24  
25  
26  
27  
28 456 While it was encouraging that initial consenting rates were high and  
29 457 remained reasonable throughout, study quality would benefit from better  
30 458 reporting of those lost to follow up who, possibly, could be a population of  
31 459 particular interest when considering the objective of promoting mental and  
32 460 emotional wellbeing for all within the school setting. Further, statistical methods  
33 461 used to account for such missing data require careful consideration to ensure that  
34 462 more stringent and conservative methods - for example, intent-to-treat analyses -  
35 463 are applied in school-based research. Otherwise, studies that instead apply a  
36 464 'defined completers' or 'completers' analysis expose themselves to the risk of  
37 465 yielding false positives.

38  
39  
40  
41  
42  
43  
44  
45 466 Another issue was the use of controls. Few studies explicitly provided  
46 467 details of the content controls groups received. Some indicated that controls may  
47 468 have already received materials available in the school around social and  
48 469 emotional wellbeing, which could reasonably have confounded results.  
49  
50 470 Additionally, considering the demographic data provided, it is unlikely that the  
51  
52 471 included studies accurately represent the cultural diversity of schools across the  
53  
54  
55  
56  
57  
58  
59  
60

1  
2  
3 472 UK, therefore caution should be taken when considering the generalizability of  
4 473 results.

5  
6  
7 474 The last prominent issue highlighted in this study was the diverse use of  
8 475 measures and length of follow up across studies, making it difficult to ascertain a  
9 476 coherent picture of measurement and effects in the current research base.

10  
11  
12 477 As commented in one study [36] and further afield [21], measurement issues  
13 478 within universal populations are particularly problematic due to common floor  
14 479 effects, particularly when using measures pertaining to the existence of mental  
15 480 health conditions. As has been well-documented, demonstrating improvement in  
16 481 'high risk' groups is somewhat easier as baseline scores are often elevated  
17 482 providing scope for reduction [41]. Demonstrating change within a universal  
18 483 population is therefore inherently more difficult and requires careful thought when  
19 484 moving forward. Is it sufficient that the absence of a mental health condition  
20 485 equates to greater wellbeing or resilience as suggested by Boniwell et al. [35], or  
21 486 should researchers direct attention to explicitly measuring wellbeing and resilience  
22 487 and mechanisms of change within such constructs in order to truly operationalise  
23 488 factors relating to the prevention of mental health difficulties?

24  
25  
26 489 Few studies in this review used wellbeing or resilience measures. However,  
27 490 those that did [37, 38] found positive effects. While any meaning of these results  
28 491 must be taken with caution due to methodological issues, this nevertheless  
29 492 suggests that such measures are at least able to detect change within a universal  
30 493 population.

31  
32  
33 494 Only one study explored mechanisms of change [39] by using cognitive  
34 495 reasoning tests when comparing several interventions, and found that a  
35 496 behavioural intervention led to more reward-seeking and a reduction in mood  
36 497 symptoms. It would be of value to explore this further given the  
37 498 neurodevelopmental stage of early adolescence when frontal lobes are still  
38 499 maturing and neuronal connections continue to grow [43]. Consequently, the  
39 500 adolescent's ability to plan, problem solve and manipulate abstract information, as  
40 501 is arguably necessary in cognitive-based interventions, may be overridden by more  
41 502 disinhibited, emotionally driven impulses and the seeking of concrete rewards, as

1  
2  
3 503 may be seen in earlier adolescence and would potentially explain increased  
4 504 receptiveness to a behavioural rather than cognitive intervention.  
5  
6

7 505

8  
9 506 ***What are the identified barriers in delivering and evaluating universal school***  
10 ***based interventions?***  
11

12  
13 508 Implementation barriers relating to fidelity to intervention delivery and  
14 509 costs were also raised within this review. Variance in fidelity measurement to  
15 510 confirm reliable manualised delivery was a recurring issue, which is of particular  
16 511 salience when delivery has been consistently argued to be related to outcome  
17 512 [10,12]. Intervention delivery itself varied between studies where school staff or  
18 513 external researchers delivered the courses. While results were mixed when  
19 514 comparing the effectiveness of teacher-led versus externally-led interventions,  
20 515 overall within this review the results were neutral suggesting, at best, that there is  
21 516 no negative impact of teacher delivery. While issues relating to treatment fidelity  
22 517 may be more prominent with teacher delivery, considering sustainability, it could  
23 518 be argued that this would be the optimal approach in school settings, especially  
24 519 considering the financial costs involved in employing external facilitators as  
25 520 demonstrated by two studies in this review [31, 41]. Further, research has  
26 521 indicated that pupils prefer both that mental health education be delivered by  
27 522 someone with a thorough knowledge of the subject, and for it to be delivered by  
28 523 someone they know e.g., a teacher [44].  
29  
30  
31  
32  
33  
34  
35  
36  
37  
38

39  
40 524 No study in this review explored the impact on any allied services such as  
41 525 CAMHS. For instance, it may be useful to audit local CAMHS referral-rates whilst  
42 526 reviewing the effectiveness of school-based interventions, and whether an increase  
43 527 or decrease in referrals would be observed. Considering the absence of reliable  
44 528 positive outcomes at the individual level at this point, a systemic perspective  
45 529 could be of value when considering any cost benefits to the wider health and social  
46 530 care services.  
47  
48  
49  
50

51  
52 531 Further, it was unclear from the review what local or national political or  
53 532 strategic drivers instigated each study, and indeed, the extent to which children  
54 533 and young people were consulted in the process, design and delivery of the  
55  
56  
57  
58  
59  
60

1  
2  
3 534 interventions. It was outside the scope of this review to explore the qualitative  
4 535 findings from the few studies that employed focus groups. Therefore, it is  
5  
6 536 recommended that future qualitative reviews of school-based research are  
7  
8 537 conducted in order to ensure that children's and young people's views as  
9  
10 538 stakeholders in this work are sufficiently represented.

11  
12 539

## 13 14 540 **Limitations**

15  
16 541 This study was limited in its ability to source evaluations representative of  
17  
18 542 the entire UK as the majority of studies were based in England. While efforts were  
19  
20 543 made to source evaluations from elsewhere in the UK, the lack of validated  
21  
22 544 measures or application of pre-post methodology meant that such evaluations from  
23  
24 545 the 'grey literature' could not be included in this review. It should therefore be  
25  
26 546 noted that there is much relevant work being conducted in schools across the UK.  
27  
28 547 However, schools and local authorities should be urged to reliably evaluate their  
29  
30 548 valuable efforts and contribute to the published literature, thereby demonstrating  
31  
32 549 the important work being driven by teachers and policymakers nationwide.

33  
34 550 This study was also limited in its date source in that only studies from the  
35  
36 551 year 2000 were included in this review. While results from other systematic  
37  
38 552 reviews suggested that little relevant research was done in the UK before this  
39  
40 553 time, it could still be that some studies were missed due to this limit.

41  
42 554

## 43 44 555 **Implications**

45  
46 556 This review highlighted the need to employ robust methodological designs  
47  
48 557 within school-based research in order for any effects to be interpreted  
49  
50 558 meaningfully. Measurement issues exist where they do not adequately detect  
51  
52 559 change in universal populations, and there is a wide variety of measures used  
53  
54 560 ranging from 'clinical' to wellbeing measures. This review concludes that school-  
55  
56 561 based researchers across the UK should attempt to come together to discuss ways  
57  
58 562 to address this issue and improve coherence in the literature.

1  
2  
3 563 An additional, imperative implication from this review is the proactive  
4 564 inclusion and involvement of teachers in this work. As has been commented  
5 565 elsewhere [45] without the ‘buy-in’ from teachers, any school-based intervention  
6 566 is less likely to sustain or achieve positive outcomes. In a time of additional  
7 567 pressures on teachers, the need to feel in control of initiatives is key. Of note, two  
8 568 of the studies in this review included adult-focussed exercises for the teachers  
9 569 themselves as an adjunct to the intervention training. This approach may go  
10 570 further to assist teachers’ stress management and understanding of mental health  
11 571 whilst attending to the needs of their pupils.  
12  
13  
14  
15  
16  
17  
18  
19

572

## 20 573 **Conclusions**

21  
22 574 The current evidence suggests there are neutral to small effects of  
23 575 universal, school-based interventions in the UK that aim to promote emotional or  
24 576 mental wellbeing or prevention of mental health difficulties. Whilst the real-world  
25 577 limitations of conducting research in schools exists, robust, long-term  
26 578 methodologies need to be attempted when conducting research in this area in  
27 579 order to explore the longitudinal impact of school-based interventions on  
28 580 wellbeing. Academic attainment, school attendance and rates of high-risk  
29 581 presentations also need to be further explored. This requires adequate recording  
30 582 of fidelity, the use of validated measures sensitive to mechanisms of change,  
31 583 reporting of those lost to follow up and any adverse effects, and the use of  
32 584 qualitative data to supplement quantitative outcomes. Interventions in the existing  
33 585 UK-based literature include educational, behavioural, cognitive and mindfulness  
34 586 components, each demonstrating variable results. Nevertheless, national and local  
35 587 policy [25, 26, 27] indicates that there remains an appetite to develop work in this  
36 588 area in order to promote wellbeing outcomes for children and young people. In this  
37 589 case, further research collaborations are required across the UK to robustly  
38 590 demonstrate any benefits for pupils or on the wider system.  
39  
40  
41  
42  
43  
44  
45  
46  
47  
48  
49  
50

51 591

52 592

53 593

1  
2  
3 594 **CONTRIBUTORSHIP**  
4

5 595 This piece of research was submitted in part fulfilment for a Doctorate  
6 596 degree in Clinical Psychology. KM (Dr Karen Mackenzie) was the main researcher  
7 597 and responsible for developing the research questions, conducting the search  
8 598 strategy and analysing results. CW (Professor Chris Williams) supervised this  
9 599 research and acted as co-rater during the search process. Many thanks to Dr Claire  
10 600 Adey (CA) who assisted in the quality rating process.  
11  
12  
13  
14

15 601 **COMPETING INTERESTS**  
16

17 602 CW is President of BABCP- the lead body for CBT in the UK, and a CBT  
18 603 researcher and trainer. He is also author of a range of CBT-based resources  
19 604 including some aimed at primary and secondary school populations. These are  
20 605 available commercially as books, online courses, and classes. He receives royalty,  
21 606 and is shareholder and director of a company that commercialises these resources.  
22  
23  
24  
25

26 607 **FUNDING STATEMENT**  
27

28 608 This research received no specific grant from any funding agency in the public,  
29 609 commercial or not-for-profit sectors.  
30  
31

32 610 **DATA SHARING**  
33

34 611 Supplementary data available upon request to the author.  
35  
36

37 612 **FIGURE LEGEND**  
38

39 Figure 1: PRISMA flow diagram  
40

41 Table 1: Overview of interventions  
42

43 Table 2: Study design and outcomes - Primary schools  
44

45 Table 3: Study design and outcomes - Secondary schools  
46  
47

48 613  
49

50 614  
51

52 615  
53

54 616  
55  
56  
57  
58  
59  
60



617 **REFERENCES**

- 618 1. Kieling C, Baker-Henningham H, Belfer M, et al. Child and adolescent mental  
619 health worldwide: evidence for action. *Lancet* 2011;378:1515-25.
- 620 2. Costello EJ, Mustillo S, Erkanli A, et al. Prevalence and development of  
621 psychiatric disorders in childhood and adolescence. *Arch Gen Psychiatry* 2003;  
622 60:837-44.
- 623 3. Kendall, P. C., Safford, S., Flannery-Schroeder, E., & Webb, A. Child anxiety  
624 treatment: Outcomes in adolescence and impact on substance abuse and  
625 depression at 7.4 year follow-up. *Journal of Consulting and Clinical Psychology*  
626 2004;72:276-287.
- 627 4. Collins, K. A., & Dozois, D. J. A. What are the active ingredients in preventative  
628 interventions for depression? *Clinical Psychology: Science and Practice*  
629 2008;15:313-330.
- 630 5. Patel V, Flisher AJ, Hetrick S, McGorry P. Mental health of young people: a  
631 global public-health challenge. *The Lancet* 2007;369(9569):1302-13.
- 632 6. World Health Organization. Atlas: Child and Adolescent Mental Health  
633 Resources: Global Concerns, Implications for the Future. WHO, 2005.
- 634 7. Masia-Warner, C., Nangle, D. W., & Hansen, D. J. Bringing evidence-based child  
635 mental health services to the schools: General issues and specific populations.  
636 *Education and Treatment of Children* 2006;29:165-172.
- 637 8. Domitrovich CE, Bradshaw CP, Greenberg MT, Embry D, Poduska JM, Ialongo NS.  
638 Integrated models of school-based prevention: logic and theory. *Psychology in*  
639 *Schools*. 2010;47(1):71-88.
- 640 9. Vostanis, P., Humphrey, N., Fitzgerald, N., Deighton, J., & Wolpert, M. (2013).  
641 How do schools promote emotional wellbeing among their pupils? Findings from a  
642 national scoping survey of mental health provision in English schools. *Child and*  
643 *Adolescent Mental Health* 2013;18:151-157.



- 1  
2  
3 644 10. Durlak, JA, Weissberg, RP, Dymnicki, AB, Taylor, RD & Schellinger, KB. The  
4 645 Impact of Enhancing Students' Social and Emotional Learning: A Meta-Analysis of  
5 646 School-Based Universal Interventions. *Child Development* 2011;82(1):405-432.  
6  
7  
8 647 11. Wells, J, Barlow, J & Stewart-Brown. A systematic review of universal  
9 648 approaches to mental health promotion in school. *Health Education* 2003;103(4):  
10 649 197-220.  
11  
12  
13 650 12. Neil, A.L. & Christensen, H. Efficacy and effectiveness of school-based  
14 651 prevention and early intervention programs for anxiety. *Clinical Psychology Review*  
15 652 2009; 29(3):208-215.  
16  
17  
18 653 13. Mychailyszyn. M.P., Brodman, D.M., Read, K.L., et al. Cognitive Behavioural  
19 654 School-based interventions for anxious and depressed youth: a meta-analysis of  
20 655 outcomes. *Clinical Psychology Science and Practice* 2012;19:129-153.  
21  
22  
23 656 14. Weare, K & Nind, M. Mental health promotion and problem prevention in  
24 657 schools: what does the evidence say? *Health Promotion International* 2011;26(1):  
25 658 29-69.  
26  
27  
28 659 15. Merry, S., Hetrick, S., Cox, G.R., et al. Psychological and educational  
29 660 interventions for preventing depression in children and adolescents. *Cochrane*  
30 661 *Database of Systematic Reviews* 2011;12.DOI:10.1002/14651858.CD003380.pub3.  
31  
32  
33 662 16. Corrieri, S., Heider, D., Conrad, I., et al. School-based prevention programs for  
34 663 depression and anxiety in adolescence: a systematic review. *Health Promotion*  
35 664 *International* 2013;29(3):427-441.  
36  
37  
38 665 17. Spence, S.H., & Shortt, A.L. Research review: Can we justify widespread  
39 666 dissemination of universal based interventions for the preventions of depression  
40 667 among children and adolescents? *Journal of Child Psychology and Psychiatry*  
41 668 2007;48(6):526-542.  
42  
43  
44 669 18. Calear, al. & Christensen, H. Review of internet-based prevention and  
45 670 treatment programs for anxiety and depression in children and adolescents. *The*  
46 671 *Medical Journal of Australia* 2010;192(11):12-14.  
47  
48  
49  
50  
51  
52  
53  
54  
55  
56  
57  
58  
59  
60

- 1  
2  
3 672 19. Kavanagh, J., Oliver, S., Lorenc, T., et al. School based cognitive-behavioural  
4 673 interventions: A systematic review of effects and inequalities. *Health Sociology*  
5 674 *Review* 2009;18: 61-78.  
6  
7  
8 675 20. Stallard, P. School-based intervention for depression and anxiety in children  
9 676 and adolescents. *Evidence-based Mental Health* 2013;16(3):60-61.  
10  
11  
12 677 21. Reavley, N., Bassilos, B., Ryan, S., et al. Interventions to build resilience in  
13 678 Young People: a literature review. *Victorian Health Promotion Foundation* 2015.  
14 679 Melbourne.  
15  
16  
17 680 22. Sancassiani, F., Pintus, E., Holte, A., et al. Enhancing the Emotional and Social  
18 681 Skills of the Youth to promote their Wellbeing and Positive Development: A  
19 682 systematic review of Universal School-based Randomised Controlled Trials. *Clinical*  
20 683 *Practice & Epidemiology in Mental Health* 2015;11:21-40.  
21  
22  
23 684 23. National Institute of Clinical Excellence. *Promoting children's social and*  
24 685 *emotional well-being in primary education*. 2008. Retrieved from  
25 686 <http://www.nice.org.uk/guidance/index>. Accessed June 2016.  
26  
27  
28 687 24. Cheney, G., Schlosser, A., Nash, P., et al. Targeted group-based interventions  
29 688 in schools to promote emotional well-being: A systematic review. *Clinical Child*  
30 689 *Psychology & Psychiatry* 2014;19(3):412-438  
31  
32  
33 690 25. Department of Education. *Mental health and behaviour in schools:*  
34 691 *Departmental advice for school staff*. 2016.  
35 692 [www.nationalarchives.gov.uk/doc/open-government-licence/version/3](http://www.nationalarchives.gov.uk/doc/open-government-licence/version/3). Accessed  
36 693 June 2016.  
37  
38  
39 694 26. Education Scotland (no publication date). Curriculum for Excellence. *Health*  
40 695 *and Wellbeing Across Learning: Responsibilities for All. Experience and Outcomes*.  
41 696 [www.educationscotland.gov.uk/health\\_wellbeing\\_experiences\\_outcomes\\_tcm4-](http://www.educationscotland.gov.uk/health_wellbeing_experiences_outcomes_tcm4-540031.pdf)  
42 697 [540031.pdf](http://www.educationscotland.gov.uk/health_wellbeing_experiences_outcomes_tcm4-540031.pdf) Accessed June 2016.  
43  
44  
45 698 27. CYMRU. 'Thinking positively: Emotional health and well-being in schools and  
46 699 Early Years settings'. 2010 [www.wales.gov.uk/educationandskills](http://www.wales.gov.uk/educationandskills). Accessed June  
47 700 2016.  
48  
49  
50  
51  
52  
53  
54  
55  
56  
57  
58  
59  
60

- 1  
2  
3 701 28. Downs, S. H., & Black, N. The feasibility of creating a checklist for the  
4 702 assessment of the methodological quality both of randomized and non-randomized  
5 703 studies of health care interventions. *Journal of Epidemiological Community Health*  
6 704 1998;52:377-384.
- 7  
8  
9  
10 705 29. Popay, J., H. Roberts, A. Sowden, F et al. *Guidance on the Conduct of*  
11 706 *Narrative Synthesis in Systematic Reviews: Final Report*. Swindon: ESRC Methods  
12 707 Programme 2006.
- 13  
14  
15 708 30. Attwood, M., Meadows, S., Stallard, P., et al. Universal and targeted  
16 709 computerised cognitive behavioural therapy (Think, Feel, Do) for emotional health  
17 710 in schools: Results from two exploratory studies. *Child and Adolescent Mental*  
18 711 *Health* 2012;17(3):173-178.
- 19  
20  
21  
22 712 31. Berry, F., Axford, N., Blower, S., et al. The effectiveness and micro-costing  
23 713 analysis of a Universal, School based, Social-Emotional Learning programme in the  
24 714 UK: A cluster-randomised controlled trial. *School Mental Health* 2016;8:238-256.
- 25  
26  
27  
28 715 32. Collins, S., Woolfson, L. M., & Durkin, K. Effects on coping skills and anxiety of  
29 716 a universal school-based mental health intervention delivered in Scottish primary  
30 717 schools. *School Psychology International* 2013; 35(1):85-100.
- 31  
32  
33  
34 718 33. Stallard, P., Simpson, N., Anderson, S., et al. The FRIENDS Emotional Health  
35 719 Programme: Initial Findings from a School-Based Project. *Child & Adolescent*  
36 720 *Mental Health* 2007;12(1):32-37.
- 37  
38  
39 721 34. Stallard, P., Skyrabina, E., Taylor, G., et al. Classroom-based cognitive  
40 722 behaviour therapy (FRIENDS): A cluster randomised controlled trial to Prevent  
41 723 Anxiety in Children through Education in Schools (PACES). *The Lancet Psychiatry*  
42 724 2014;1(3):185-192.
- 43  
44  
45  
46 725 35. Boniwell, I., Osin, E.N., & Martinez, C. Teaching Happiness at school: non-  
47 726 randomised controlled mixed-methods feasibility study on the effectiveness of  
48 727 well-being lessons. *The Journal of Positive Psychology* 2016;11(1):85-98.
- 49  
50  
51  
52 728 36. Challen, A. R., Machin, S.J., & Gillham J.E. The UK Resilience Programme: a  
53 729 school-based universal nonrandomized pragmatic controlled trial. *Journal of*  
54 730 *Consulting & Clinical Psychology* 2014;82(1):75-89.

- 1  
2  
3 731 37. Chisholm, K. E., Patteron, P., Torgerson, C., et al. Impact of contact on  
4 732 adolescents' mental health literacy and stigma: the SchoolSpace cluster  
5  
6 733 randomised controlled trial. *BMC Open* 2016,6:e009435.  
7  
8 734 38. Kuyken, W., Weare, K., Obioha, C., et al. Effectiveness of the Mindfulness in  
9  
10 735 Schools Programme: Non-randomised controlled feasibility study. *The British*  
11  
12 736 *Journal of Psychiatry* 2013; 203(2):126-131  
13  
14 737 39. Rice, F., Rawal, A., Riglin, L., et al. Examining reward-seeking, negative self-  
15  
16 738 beliefs and over-general autobiographical memory as mechanisms of change in  
17  
18 739 classroom prevention programs for adolescent depression. *Journal of Affective*  
19  
20 740 *Disorders* 2015;186:320-327.  
21  
22 741 40. Naylor, P., Cowie, H.E., Watters, S.J., et al. Impact of a mental health  
23  
24 742 teaching programme on adolescents. *The British Journal of Psychiatry*  
25  
26 743 2009;194:365-370.  
27  
28 744 41. Stallard. P., Phillips. R., Montgomery, A.A., et al. A cluster RCT to determine  
29  
30 745 the clinical effectiveness and cost-effectiveness of classroom-based cognitive-  
31  
32 746 behavioural therapy (CBT) in reducing symptoms of depression in high-risk  
33  
34 747 adolescents. *Health Technology Assessment* 2013;17(47).  
35  
36 748 42. Erikson, Erik H. Identity, Youth and Crisis. New York: Norton. 1968.  
37  
38 749 43. Spear, L.P. Adolescent Neurodevelopment. [Journal of Adolescent Health 2013;](#)  
39  
40 750 [52\(2\):S7-13. doi:10.1016/j.jadohealth.2012.05.006](#)  
41  
42 751 44. Woolfson, R, Woolfson, L, Mooney, L, Bryce, D. Young people's views of mental  
43  
44 752 health education in secondary schools: A Scottish study. *Journal of Child: care,*  
45  
46 753 *health and development* 2008;35(6):790-798.  
47  
48 754 45. Weare, K. Editorial: Child and adolescent mental health in schools. *Child and*  
49  
50 755 *Adolescent Mental Health* 2015;20(2):6-8.  
51  
52 756  
53  
54 757  
55  
56 758  
57  
58 759

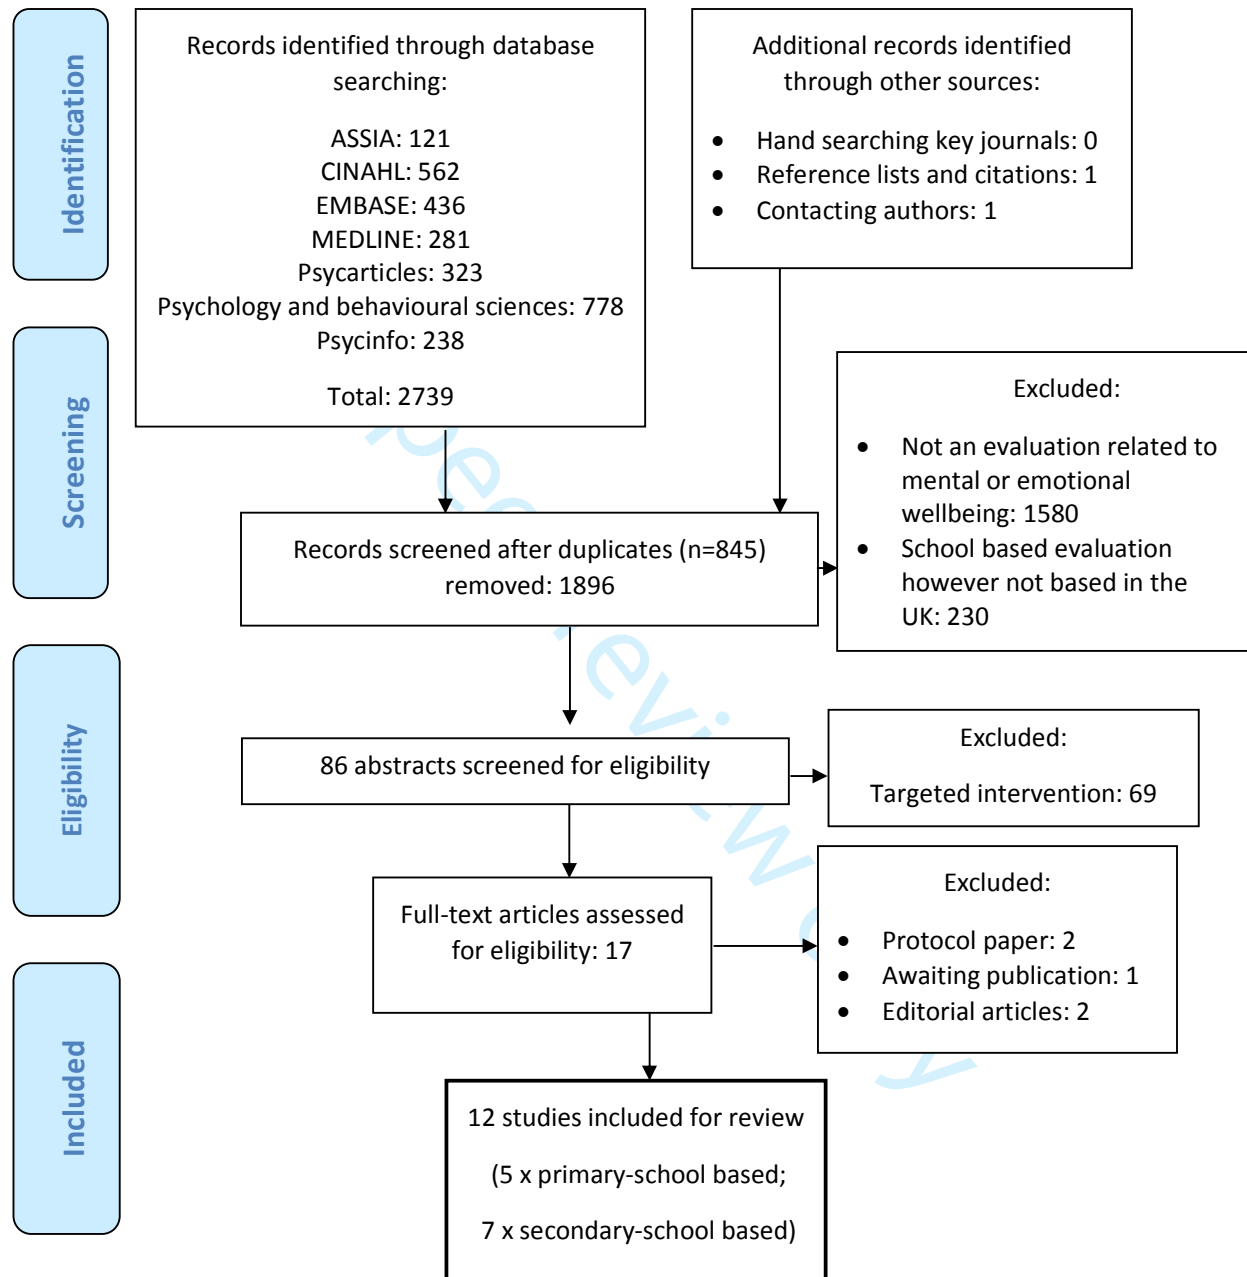

Figure 1: PRISMA diagram of systematic search process.

# BMJ Open

**Universal, school-based interventions to promote mental and emotional wellbeing. What is being done in the UK and does it work?  
A systematic review**

|                                 |                                                                                                                              |
|---------------------------------|------------------------------------------------------------------------------------------------------------------------------|
| Journal:                        | <i>BMJ Open</i>                                                                                                              |
| Manuscript ID                   | bmjopen-2018-022560.R1                                                                                                       |
| Article Type:                   | Research                                                                                                                     |
| Date Submitted by the Author:   | 12-Jun-2018                                                                                                                  |
| Complete List of Authors:       | Mackenzie, Karen; NHS Ayrshire and Arran, Psychological Services<br>Williams, Christopher; University of Glasgow, Psychiatry |
| <b>Primary Subject Heading</b>: | Mental health                                                                                                                |
| Secondary Subject Heading:      | Public health                                                                                                                |
| Keywords:                       | school based, intervention, wellbeing, review, resilience, MENTAL HEALTH                                                     |
|                                 |                                                                                                                              |

SCHOLARONE™  
Manuscripts

Peer Review Only

1  
2  
3  
4  
5  
6  
7  
8  
9  
10  
11  
12  
13  
14  
15  
16  
17  
18  
19  
20  
21  
22  
23  
24  
25  
26  
27  
28  
29  
30  
31  
32  
33  
34  
35  
36  
37  
38  
39  
40  
41  
42  
43  
44  
45  
46  
47  
48  
49  
50  
51  
52  
53  
54  
55  
56  
57  
58  
59  
60

1  
2  
3  
4  
5  
6  
7  
8  
9  
10  
11  
12  
13  
14  
15  
16  
17  
18  
19  
20  
21  
22  
23  
24  
25  
26  
27  
28  
29  
30  
31  
32  
33  
34  
35  
36  
37  
38  
39  
40  
41  
42  
43  
44  
45  
46  
47  
48  
49  
50  
51  
52  
53  
54  
55  
56  
57  
58  
59  
60

# Universal, school-based interventions to promote mental and emotional wellbeing. What is being done in the UK and does it work?

## A systematic review

Karen Mackenzie\*, Chris Williams\*\*

Address for correspondence:

\*Psychological Services NHS Ayrshire and Arran

Ayrshire Central Hospital

Kilwinning Road

Irvine KA12 8SS

Email: karen.mackenzie@aapct.scot.nhs.uk

\*\*Mental Health and Wellbeing

University of Glasgow

1<sup>st</sup> Floor, Administrative Building,

Gartnavel Royal Hospital

1055 Great Western Road

Glasgow

G12 0XY

E-mail: chris.williams@glasgow.ac.uk

**Keywords:** Review, school-based, resilience, wellbeing, intervention.

Word count: 5067 (excluding abstract, figures, tables and references).

29 **ABSTRACT**

30 **Objectives:** The present review aimed to assess the quality, content and  
31 evidence of efficacy of universally-delivered (to all pupils aged 5-16 years),  
32 school-based, mental health interventions designed to promote mental  
33 health/wellbeing and resilience, using a validated outcome measure and  
34 provided within the UK in order to inform UK schools-based wellbeing  
35 implementation.

36 **Design:** A systematic review of published literature set within UK  
37 mainstream school settings.

38 **Data sources:** Embase, Cinahl, Medline, PsycInfo, PsychArticles, ASSIA  
39 and Psychological and Behavioural Sciences published between 2000 and April  
40 2016.

41 **Eligibility criteria:** Published in English; universal interventions that  
42 aimed to improve mental health/emotional wellbeing in a mainstream school  
43 environment; school pupils were the direct recipients of the intervention; pre-  
44 post design utilised allowing comparison using a validated outcome measure.

45 **Data extraction and synthesis:** 12 studies were identified including RCTs  
46 and non-controlled pre-post designs (5 primary school based, 7 secondary school  
47 based). A narrative synthesis was applied with study quality check (Downs and  
48 Black, 1998).

49 **Results:** Effectiveness of school-based universal interventions was found  
50 to be neutral or small with more positive effects found for poorer quality studies  
51 and those based in Primary schools (pupils aged 9-12 years old). Studies varied  
52 widely in their use of measures and study design. Only four studies were rated  
53 “excellent” quality. Methodological issues such as small sample size, varying  
54 course fidelity and lack of randomisation reduced overall study quality. Where  
55 there were several positive outcomes, effect sizes were small and  
56 methodological issues rendered many results to be interpreted with caution.  
57 Overall, results suggested a trend whereby higher quality studies reported less  
58 positive effects. The only study that conducted a health economic analysis  
59 suggested the intervention was not cost-effective.

60 **Conclusions:** The current evidence suggests there are neutral to small  
61 effects of universal, school-based interventions in the UK that aim to promote



62 emotional or mental wellbeing or the prevention of mental health difficulties.  
63 Robust, long-term methodologies need to be pursued ensuring adequate  
64 recording of fidelity, the use of validated measures sensitive to mechanisms of  
65 change, reporting of those lost to follow up and any adverse effects. Further  
66 high quality and large-scale research is required across the UK in order to  
67 robustly test any long-term benefits for pupils or on the wider educational or  
68 health system.

69

70 ***Limitations:***

- 71 ○ Included papers largely based in England so unlikely to be  
72 representative of the cultural diversity within UK schools.
- 73 ○ Date limit excluded papers published prior to 2000.

74 ***Strengths:***

- 75 ○ Addressed a gap in the literature.
- 76 ○ Used a robust methodology to review the literature in this area.
- 77 ○ Conclusions will help inform UK policy and practice as this topic  
78 continues to be debated in current health, education and political  
79 spheres.

80

81 **INTRODUCTION**

82 The mental and emotional wellbeing of children and young people has  
83 received increasing attention worldwide. It has been reported that the  
84 prevalence of mental health problems ranges from 10-20% [1], and that by the  
85 age of 18 up to 20% of young people will have experienced an emotional disorder  
86 [2]. Mental health conditions such as anxiety and depression often persist into  
87 adulthood [3] and have been associated with a range of negative outcomes  
88 including lower academic achievement, higher likelihood of health risk  
89 behaviours, self-harm and suicide [4, 5]. However, provision of services for those  
90 in need can be as low as 20% [6]. Such access issues to specialist services like  
91 CAMHS has meant that school-based interventions have been increasingly

1 explored due to their far reach [7] and existing infrastructure to support child  
2 development [8], while noting that schools need support to use the evidence  
3 base when applying such interventions [9].  
4  
5

6 95

7  
8 Numerous systematic reviews and meta-analyses have been conducted to  
9 review the effectiveness of school-based, mental health interventions at both  
10 the universal (delivered to all pupils irrespective of perceived need), and  
11 targeted (delivered to vulnerable or 'high risk' individuals only) levels. Overall,  
12 this literature has indicated mixed results regarding efficacy of school-based  
13 interventions.  
14  
15

16  
17 Findings have suggested positive effects on social emotional skills, self-  
18 concept, positive social behaviours, conduct problems, emotional distress and  
19 problem solving when reviewing school based, universal programs aiming to  
20 enhance social and emotional skills [10-11]. Further reviews found Cognitive  
21 Behavioural Therapy (CBT) formed the basis of the majority of anxiety  
22 prevention programs (78%) and over 75% of trials reported a significant reduction  
23 in anxiety [12]. CBT-based interventions were also tentatively endorsed as mildly  
24 effective in reducing depression (E.S. = 0.29) and moderately effective (E.S. =  
25 0.50) in reducing anxiety symptoms [13].  
26  
27  
28  
29  
30  
31

32 111

33  
34 With regards to optimal implementation, it has been noted that more  
35 positive outcomes were obtained for programs adopting a 'whole-school'  
36 approach, that lasted more than one year, and aimed to promote mental health  
37 rather than prevent mental illness [11]. A balance of both universal and targeted  
38 approaches has been recommended, along with accurate implementation of  
39 interventions [14].  
40  
41  
42  
43

44 118

45  
46 However, the long-term impact and target audience of such initiatives has  
47 been questioned. A meta-analysis reviewing prevention of depression  
48 programmes found that while there was evidence of immediate post-  
49 intervention effects, these did not sustain over time (24-36 months) [15].  
50 Moreover, a review evaluating both anxiety and depression programmes found  
51 that while the majority were effective for depression (65%) and anxiety (73%),  
52 the effect sizes were small (0.12 - 0.29) [16].  
53  
54  
55  
56  
57  
58  
59  
60

1  
2  
3  
4  
5  
6  
7  
8  
9  
10  
11  
12

127 It has also been argued that universal prevention interventions are,  
128 overall, not efficacious [17-18], with targeted programs being most effective  
129 (E.S. = 0.21 to 1.40). Likewise, that while school-based CBT programmes have  
130 been demonstrated to lead to a short-term reduction in depression symptoms,  
131 interventions are most effective for those in the clinical range [19].

132

133 The literature has, therefore, conveyed conflicting results regarding the  
134 efficacy of universal school-based interventions whilst consistently in  
135 highlighting methodological issues within the existing research base. Common  
136 issues include a lack of active intervention controls [20], studies'  
137 operationalisation and measurements of 'resilience' lack homogeneity [21]; that  
138 weak program fidelity and treatment dosage impacts outcomes [10] and that  
139 there is insufficient use of validated, standardised measures and long-term  
140 follow up [22].

141

142 It is also noteworthy that the majority of reviews have focused  
143 worldwide, with most reviewed interventions based in Australia, the US or  
144 Canada. No reviews have to date focused on studies in schools in the UK. This  
145 trend was also referenced in a NICE funded review [23] of targeted and universal  
146 school-based interventions who noted that though findings from international  
147 based research are helpful, the generalisability to the UK educational system is  
148 questionable. Education system differences between countries and continents  
149 such as funding, political drivers, curriculum pressures and workforce planning  
150 issues give rise to a need for reviews specifically within the UK context,  
151 especially while local funders and UK commissioners face calls to address rising  
152 mental health problems in schools. Therefore, it is particularly timely to have  
153 access to the most relevant information drawn from the current literature as it  
154 pertains to the UK educational system specifically.

155

156 One systematic review of targeted school-based interventions within the  
157 UK research has been conducted [24]. This found that nurture groups  
158 demonstrate an immediate positive impact on the social and emotional

1 159 wellbeing on vulnerable young people, however, that results from longer term  
2  
3 160 follow-up studies are less clear.

4 161

5  
6 162 The need to carry out a review of universal school-based interventions  
7  
8 163 specifically within the UK context therefore remains. This is especially pertinent  
9  
10 164 in light of the increasing emphasis from national government on developing  
11 165 CAMHS services within the UK, and the impetus on health and education services  
12 166 to work together in order to improve wellbeing outcomes for children and young  
13 167 people [25, 26, 27].

14 168

### 15 169 **Review aims**

16  
17  
18  
19  
20 170 The present review aims to fill this gap in the literature by focusing on  
21 171 universally-delivered, school-based mental health interventions provided within  
22 172 the UK only. The following questions will be explored:

- 23  
24  
25 173 *1. How effective are universal school-based interventions in the UK that*  
26 174 *promote mental health, emotional wellbeing, or psychological resilience*  
27 175 *and what tools are being used to measure effectiveness?*  
28  
29 176 *2. What methodologies are being applied in UK schools when trialling*  
30 177 *interventions and what is the quality of these studies?*  
31  
32 178 *3. What are the intervention characteristics e.g. delivery, content, target*  
33 179 *audience?*  
34  
35 180 *4. What are the identified barriers in delivering and evaluating universal*  
36 181 *school based interventions?*

### 37 182 **Search Strategy**

38  
39  
40  
41  
42  
43 183 Electronic databases were searched for relevant published research on  
44 184 14<sup>th</sup> April 2016: EMBASE, CINAHL, MEDLINE, PsycINFO, PsycArticles, ASSIA and  
45 185 Psychological and Behavioural Sciences. Selected journals relevant to the area  
46 186 were hand-searched (British Journal of Educational Psychology; British Journal of  
47 187 School Nursing). Previous reviews and relevant papers were reviewed and  
48 188 following consultation with University librarians, keyword search terms were  
49 189 identified and linked with the Boolean operators 'AND' and 'OR' (see  
50 190 supplementary file for search strategy examples):

1 191 Study design criteria were wide to allow for the diverse range of  
2 192 methodologies used to overcome challenges in school-based research. Search  
3 193 terms were, therefore, chosen primarily to promote sensitivity to the subject  
4 194 area. A limit date was set from 2000 to April 2016. The early date limit was  
5 195 selected as this area has been promoted by UK governmental policy largely  
6 196 within the last decade. Further, detailed appraisal of the previous systematic  
7 197 reviews in this area found few, if any, discovered studies prior to this date.

### 13 198 **Study selection**

15 199 The inclusion criteria were as follows:

- 18 200 • The intervention was based in a mainstream school environment;
- 19 201 • The intervention was universal in its application (i.e. to all pupils  
20 202 irrespective of need)
- 23 203 • Pupils were the direct recipients of the interventions;
- 24 204 • The study adopted a pre-post design;
- 26 205 • The intervention aimed to target mental health and/or emotional  
27 206 wellbeing;
- 29 207 • The study used a validated measure to quantitatively evaluate emotional  
30 208 or mental wellbeing outcomes and reported those outcomes;
- 33 209 • The study was published in English between 2000 and April 2016 in a peer  
34 210 reviewed journal.

36 211 Exclusion criteria included:

- 39 212 • The study aims or methodology did not fit the inclusion criteria.
- 40 213 • Any studies using a non-validated outcome measure as their primary  
41 214 outcome e.g. Likert scales that were unvalidated.
- 44 215 • Any studies using a purely qualitative methodology.

### 46 216 **Details of included and excluded studies**

48 217 Duplicate papers were excluded. Titles were screened to identify only  
49 218 those that clearly met inclusion criteria. Abstracts were assessed independently  
50 219 by the authors. Raters met to compare included papers. Where eligibility was  
51 220 unclear based on the abstract, full articles were retrieved and assessed jointly  
52 221 by raters. Reference lists of included papers were searched as well as previous

1 222 reviews on related topics. Articles citing included articles were also reviewed  
2 223 and one paper was sourced via this method. Authors of protocol papers were  
3 224 contacted leading to an additional paper being sourced. Experts in the field in  
4 225 Scotland, England, Northern Ireland and Wales were contacted regarding any  
5 226 other studies. However, none were eligible for inclusion. Twelve papers were  
6 227 included in the final review (see Figure 1).

7  
8  
9  
10  
11 228 (Editors: See attached Image)

### 12 229 *Quality rating of studies*

13  
14  
15  
16 230 The Downs and Black [28] checklist was used to assess quality. This  
17 231 checklist assesses internal and external validity, selection bias and study power  
18 232 over 27 items. This checklist was used due to its utility in assessing studies  
19 233 relating to public health and its applicability to assess quality in both  
20 234 randomised and non-randomised studies. Reliability and validity assessment has  
21 235 found the Quality Index to have high internal consistency, good test-retest  
22 236 ( $r = 0.88$ ) and inter-rater ( $r = 0.75$ ) reliability and good face and criterion validity  
23 237 ( $0.90$ ) [28].

24  
25  
26  
27  
28  
29  
30 238 A sample of papers were assessed by an independent researcher (CA). Any  
31 239 rating discrepancies were discussed and a shared decision reached. A decision  
32 240 was taken not to exclude any studies found to be of poor quality as the aim of  
33 241 this current review was to critique universal school-based interventions whilst  
34 242 acknowledging that the real-world implementation of such evaluations can be  
35 243 challenging and, as a result, may reasonably impact study quality.

### 36 244 *Data extraction*

37  
38  
39  
40  
41  
42 245 Due to the heterogeneity of the studies, meta-analysis was not  
43 246 appropriate. A narrative synthesis was applied to explain the findings of this  
44 247 review in line with current guidance [29]. Information gathered from the studies  
45 248 included: study aim, intervention (model, duration, delivery), sample  
46 249 characteristics, study procedures, outcomes and measures, and results. Issues  
47 250 relating to the implementation, as well as effectiveness, of interventions were  
48 251 also noted from those studies commenting on such barriers.

### 49 252 **Patient and Public Involvement**

1 253 No patients or members of the public were directly involved in this piece of  
2  
3 254 research.

## 4 5 255 **RESULTS**

### 6 7 256 **Overview of interventions**

8  
9 257 Of the twelve studies sourced, five took place in primary schools [30-34]  
10  
11 258 and seven took place in secondary schools [35-41]. An overview of study  
12  
13 259 interventions based in Primary and Secondary schools can be found in Table 1.

#### 14 15 260 *Primary school studies:*

16  
17 261 The five studies within primary school settings evaluated interventions  
18  
19 262 based on computerised CBT [30]; a teacher led intervention embedded within  
20  
21 263 the curriculum (e.g. PATHS - 'Promoting Alternative Thinking Strategies' [31]);  
22  
23 264 manualised anxiety interventions (e.g. a locally developed anxiety intervention,  
24  
25 265 or the Australian developed 'FRIENDS' programme) delivered by both school staff  
26  
266 (teachers and nurses) and external health staff (e.g. psychologists) [32-34].

#### 27 28 267 *Secondary school studies:*

29  
30 268 Three of the secondary school-based studies trialled interventions based  
31  
32 269 on Cognitive Behavioural Therapy principles (e.g. UK Resilience programme  
33  
34 270 (UKRP), Resourceful Adolescent Programme (RAP-UK) [36, 39, 41]) delivered by  
35  
36 271 school staff [36], educational psychologists [39] and external facilitators [41].  
37  
38 272 Interventions were also said to include principles of Interpersonal Therapy (RAP-  
39  
40 273 UK [41]) and behavioural approaches ('TRY' [39]).

41  
42 274 One study trialled an intervention based on Positive Psychology [35], two  
43  
44 275 studies trialled a mindfulness-based intervention [38-39] and two trialled locally  
45  
46 276 developed mental health education sessions delivered to all pupils [37,40].  
47  
48 277 These interventions were led by trained school teachers [35, 38, 40], and trained  
49  
50 278 volunteers [37]. All delivered the intervention during Personal Health and Social  
51  
52 279 Education (PHSE) classes.

### 53 54 280 **Methodological quality**

55  
56 281 The quality of studies ranged from 'poor' (34% [30]; 37.5% [35]) to  
57  
58 282 'excellent' (75% [34,37]; 78.1% [36]; 81.3% [41]).



283 Six studies used a randomised controlled pre-post design [30-32, 34, 37,  
 284 41]. The remaining were non-randomised pre-post designs and only one did not  
 285 have a control group [33]. Some studies were particularly weak on their  
 286 description of sample characteristics and representation of the population  
 287 [30,35], reporting of those lost to follow up and accounting for those in the  
 288 analysis [32,35], and the exploring of adverse events, of which only one study  
 289 provided information [41]. Only six studies provided a power calculation [31,  
 290 34,36,37,40,41], most of which had samples sufficiently powered to determine  
 291 an effect (except [37]). The remaining studies did not provide such information.

292 Of the eleven studies employing controls, six used controls from the same  
 293 school in which the intervention was taking place (32,34,36,37,39). All other  
 294 studies recruited controls from different schools.

295 Sample sizes ranged from 13 [30] to 5075 [31]. The age of participants  
 296 ranged from 4 [31] to 16 years old [38,41] with the majority of studies targeting  
 297 the early adolescent age range (9-12 years old) at the end of Primary school or  
 298 at the beginning of Junior / Secondary school [30, 32, 34-37].

31 **Table 1. Overview of interventions based in Primary and Secondary schools.**

32 **PRIMARY SCHOOLS**

| 35 <b>Study</b><br>36 <b>(Location)</b>                                                                    | 37 <b>Sample</b>                                                                                                 | 38 <b>Study aim /</b><br>39 <b>hypothesis</b>                                                                        | 40 <b>Intervention - Theoretical</b><br>41 <b>model and Content</b>                                                                                                                                                                                                                                                                                                                           | 42 <b>Intervention -</b><br>43 <b>Setting,</b><br>44 <b>Structure and</b><br>45 <b>Delivery</b>                                                                |
|------------------------------------------------------------------------------------------------------------|------------------------------------------------------------------------------------------------------------------|----------------------------------------------------------------------------------------------------------------------|-----------------------------------------------------------------------------------------------------------------------------------------------------------------------------------------------------------------------------------------------------------------------------------------------------------------------------------------------------------------------------------------------|----------------------------------------------------------------------------------------------------------------------------------------------------------------|
| 46 <b>Attwood et</b><br>47 <b>al., 2012</b><br>48 <b>[30]</b><br>49 <b>(Bristol,</b><br>50 <b>England)</b> | 51 10-12<br>52 year old<br>53 boys<br>54 from<br>55 two co-<br>56 educatio<br>57 nal<br>58 schools.<br>59 (n=13) | 60 A proof of<br>concept study<br>to explore<br>the viability<br>and possible<br>benefits of a<br>cCBT<br>programme. | 'Think, Feel, Do' - Based on CBT<br>principles with a psychoeducation<br>component. Cartoon characters<br>guide users through various<br>activities including: emotional<br>recognition; linking thoughts,<br>feelings and behaviours;<br>identifying and challenging<br>negative thoughts; and problem<br>solving. Involves quizzes,<br>practical exercises, videos, music<br>and animation. | Six x 45min<br>sessions delivered<br>via an interactive<br>multimedia CD-<br>ROM.<br><br>Took place within<br>the school,<br>facilitated by the<br>researcher. |
| 61 <b>Berry et</b><br>62 <b>al., 2016</b>                                                                  | 63 4-6 year<br>64 old<br>65 pupils                                                                               | 66 Test the<br>67 effectiveness<br>68 and cost-                                                                      | 69 'PATHS' (Promoting alternative<br>70 thinking strategies). Aims to<br>71 improve skills in five areas: self-                                                                                                                                                                                                                                                                               | 72 44 lessons in Year<br>73 1; 47 x lessons in<br>74 Year 2. Delivered                                                                                         |

|                                                                                                           |                                                             |                                                                                                                        |                                                                                                                                                                                                                                                                                                                                                  |                                                                                                                                                                                       |
|-----------------------------------------------------------------------------------------------------------|-------------------------------------------------------------|------------------------------------------------------------------------------------------------------------------------|--------------------------------------------------------------------------------------------------------------------------------------------------------------------------------------------------------------------------------------------------------------------------------------------------------------------------------------------------|---------------------------------------------------------------------------------------------------------------------------------------------------------------------------------------|
| <p><b>[31]</b></p> <p><b>(Birmingham, England)</b></p>                                                    | <p>(n=5075; 56 x schools)</p>                               | <p>effectiveness of the intervention to reduce children's level of behavioural and emotional difficulty.</p>           | <p>awareness, managing feelings, motivation, empathy and social skills. Lessons are developmentally sequenced and focus on techniques for self-control; emotional and interpersonal understanding steps for solving interpersonal problems; positive self-esteem and improved peer relationships.</p>                                            | <p>by trained teachers within classroom.</p> <p>Manual provides teacher scripts, pictures, activity sheets, photos, posters, and home activities.</p>                                 |
| <p><b>Collins et al., 2013 [32]</b></p> <p><b>(South Lanarkshire, Scotland)</b></p>                       | <p>9-10 year old pupils (n=317; 9 schools; 18 classes).</p> | <p>To explore if anxiety &amp; coping showed improvement post-intervention, and test effects of delivery.</p>          | <p>'Lessons for living: Think Well, Do Well'. CBT based intervention to develop coping skills. A series of skills practice using interactive teaching methods. Children are guided to recognise emotional symptoms, reduce avoidant coping strategies, and focus on proactive problems solving and support-seeking.</p>                          | <p>Ten lessons delivered by a psychologist (n=103) &amp; teacher (n=79) during PSE. Teachers provided with intervention manual following one-day training.</p>                        |
| <p><b>Stallard et al., 2007 [33]</b></p> <p><b>(Bath &amp; N.E. Somerset, England)</b></p>                | <p>9-10 year old pupils (n=106; 3 schools; 4 classes).</p>  | <p>To evaluate an Australian-originated intervention in the UK; test delivery by school nurses.</p>                    | <p>'FRIENDS - Feelings, Relax, I can do it, Explore solutions, Now reward, Don't forget practice, Smile'. Based on CBT principles it teaches children practice skills to: identify their anxious feelings and learn to relax; identify unhelpful thoughts and replace them with helpful thoughts; face and overcome problems and challenges.</p> | <p>Ten sessions delivered by school nurses who attended 2-day training. Lessons comprise group work, workbooks, role play and games. Parents invited to pre-intervention session.</p> |
| <p><b>Stallard et al., 2014 [34]</b></p> <p><b>(Bath, N.E. Somerset, Swindon, Wiltshire, England)</b></p> | <p>9-10 year old pupils (n=1448; 45 x schools)</p>          | <p>To assess the effectiveness of FRIENDS delivered by both health and school professionals on anxiety prevention.</p> | <p>As above (Stallard et al., 2007)</p>                                                                                                                                                                                                                                                                                                          | <p>Nine x 60 min lessons delivered to whole classes. Health-led group: two trained facilitators. Teacher-led group: led by class teacher. All attended 2-day training.</p>            |

## SECONDARY SCHOOLS

| Study (Location)                                                                      | Sample                                                                  | Study aim / hypothesis                                                                                                                                                                | Intervention - Theoretical model and Content                                                                                                                                                                                                                                                                                                         | Intervention - Setting, Structure & Delivery                                                                                                                       |
|---------------------------------------------------------------------------------------|-------------------------------------------------------------------------|---------------------------------------------------------------------------------------------------------------------------------------------------------------------------------------|------------------------------------------------------------------------------------------------------------------------------------------------------------------------------------------------------------------------------------------------------------------------------------------------------------------------------------------------------|--------------------------------------------------------------------------------------------------------------------------------------------------------------------|
| <b>Boniwell et al., 2016 [35]</b><br><br>(S.E. London, England)                       | 11-12 year old pupils (n=296; 2 x Haberdashers' Aske's Fed. of Schools) | To test the efficacy of a new school programme for the promotion of happiness and wellbeing skills.                                                                                   | 'Personal Wellbeing Lesson Curriculum'. Covers the 'scientific basis of happiness' focusing specifically on two core aspects: positive emotions / experiences and positive relationships. Based on theoretical constructs from wellbeing research and positive psychology e.g. 'three good things', forgiveness letter, gratitude visit.             | Eighteen bi-weekly 50 min scripted lessons delivered to 8 classes by 4 teachers who attended 5-day training. Provided with lesson plans, PowerPoints and handouts. |
| <b>Challen et al., 2014 [36]</b><br><br>(Greater London, N.W. England & N.E. England) | 11-12 year old pupils (n=2844; 16 x schools; 3 x L.As)                  | To evaluate a UK version of Penn Resiliency Program (PRP). Hypothesised high completion rates and reduction of depression symptoms.                                                   | 'UK Resiliency Program'. Aims to build resilience and promote realistic thinking and adaptive coping, based on Ellis's 'Activating event-belief consequences model'. Teaches cognitive behavioural and social problem-solving skills; encourages accurate appraisal of situations; and assertiveness, negotiation and relaxation skills.             | An 18-hour program delivered within the timetable at the teacher's discretion. Delivered by school staff who attended 10-day training in the US.                   |
| <b>Chisholm et al., 2016 [37]</b><br><br>(Birmingham, England)                        | 12-13 year old pupils (n=769; 6 x schools).                             | To test whether contact with an individual with MH diagnosis plus education is more effective in reducing stigma, improving MH literacy and promoting wellbeing than education alone. | 'Schoolspace'. A 10-module MH intervention designed by study researchers covering topics such as stress, depression, psychosis, different ways of thinking and a drama workshop. The 'contact' group had an individual facilitating who was a MH service user and had a diagnosis (e.g. psychosis, BPD) - this was revealed halfway through the day. | A one-day intervention within the school led by NHS staff, trained volunteers and MH service users.                                                                |
| <b>Kuyken et al., 2013 [38]</b><br><br>(England)                                      | 12-16 year old pupils (n= 522; 12 x                                     | To investigate the acceptability of a mindfulness programme for teachers and                                                                                                          | 'Mindfulness in Schools Program' (MiSP). Involved learning to direct attention to immediate experience with open-minded curiosity and acceptance. Skills were learned                                                                                                                                                                                | Nine weekly scripted lessons delivered as part of the curriculum, or at lunchtime by 7                                                                             |

|    |                                                                   |                                                                |                                                                                                                                                                     |                                                                                                                                                                                                                                                                                                                                                                                                                                                                     |                                                                                                                                                                                          |
|----|-------------------------------------------------------------------|----------------------------------------------------------------|---------------------------------------------------------------------------------------------------------------------------------------------------------------------|---------------------------------------------------------------------------------------------------------------------------------------------------------------------------------------------------------------------------------------------------------------------------------------------------------------------------------------------------------------------------------------------------------------------------------------------------------------------|------------------------------------------------------------------------------------------------------------------------------------------------------------------------------------------|
| 1  |                                                                   | schools).                                                      | students; test efficacy of programme on MH and wellbeing.                                                                                                           | through practice sessions and everyday application. Mindfulness practice used to work with mental states and everyday stressors to cultivate wellbeing and promote mental health.                                                                                                                                                                                                                                                                                   | teachers trained and approved to deliver the MiSP curriculum.                                                                                                                            |
| 2  |                                                                   |                                                                |                                                                                                                                                                     |                                                                                                                                                                                                                                                                                                                                                                                                                                                                     |                                                                                                                                                                                          |
| 3  |                                                                   |                                                                |                                                                                                                                                                     |                                                                                                                                                                                                                                                                                                                                                                                                                                                                     |                                                                                                                                                                                          |
| 4  |                                                                   |                                                                |                                                                                                                                                                     |                                                                                                                                                                                                                                                                                                                                                                                                                                                                     |                                                                                                                                                                                          |
| 5  |                                                                   |                                                                |                                                                                                                                                                     |                                                                                                                                                                                                                                                                                                                                                                                                                                                                     |                                                                                                                                                                                          |
| 6  |                                                                   |                                                                |                                                                                                                                                                     |                                                                                                                                                                                                                                                                                                                                                                                                                                                                     |                                                                                                                                                                                          |
| 7  |                                                                   |                                                                |                                                                                                                                                                     |                                                                                                                                                                                                                                                                                                                                                                                                                                                                     |                                                                                                                                                                                          |
| 8  |                                                                   |                                                                |                                                                                                                                                                     |                                                                                                                                                                                                                                                                                                                                                                                                                                                                     |                                                                                                                                                                                          |
| 9  |                                                                   |                                                                |                                                                                                                                                                     |                                                                                                                                                                                                                                                                                                                                                                                                                                                                     |                                                                                                                                                                                          |
| 10 | <b>Rice et al., 2015 [39]</b>                                     | 13-14 year old pupils (n=256; 3 x schools).                    | To compare three types of intervention which may prevent adolescent depression and explore cognitive mechanisms involved with each.                                 | 'TRY' (Thinking about Reward in Young People). Aimed to enhance reward processing through actively selecting activities to lift mood. CBT. Aimed to change negative thinking patterns by encouraging evaluation of thoughts. 'MBCT' (Mindfulness Based Cognitive Therapy). Aimed to promote awareness and acceptance of thoughts and to develop regulation of attention through guided meditation. Psychoeducation regarding depression was provided to all groups. | Eight weekly manualised sessions of each intervention delivered within 50-minute PHSE lessons by Educational Psychologists who attended regular supervision.                             |
| 11 | <b>(S.E. England)</b>                                             |                                                                |                                                                                                                                                                     |                                                                                                                                                                                                                                                                                                                                                                                                                                                                     |                                                                                                                                                                                          |
| 12 |                                                                   |                                                                |                                                                                                                                                                     |                                                                                                                                                                                                                                                                                                                                                                                                                                                                     |                                                                                                                                                                                          |
| 13 |                                                                   |                                                                |                                                                                                                                                                     |                                                                                                                                                                                                                                                                                                                                                                                                                                                                     |                                                                                                                                                                                          |
| 14 |                                                                   |                                                                |                                                                                                                                                                     |                                                                                                                                                                                                                                                                                                                                                                                                                                                                     |                                                                                                                                                                                          |
| 15 |                                                                   |                                                                |                                                                                                                                                                     |                                                                                                                                                                                                                                                                                                                                                                                                                                                                     |                                                                                                                                                                                          |
| 16 |                                                                   |                                                                |                                                                                                                                                                     |                                                                                                                                                                                                                                                                                                                                                                                                                                                                     |                                                                                                                                                                                          |
| 17 |                                                                   |                                                                |                                                                                                                                                                     |                                                                                                                                                                                                                                                                                                                                                                                                                                                                     |                                                                                                                                                                                          |
| 18 |                                                                   |                                                                |                                                                                                                                                                     |                                                                                                                                                                                                                                                                                                                                                                                                                                                                     |                                                                                                                                                                                          |
| 19 |                                                                   |                                                                |                                                                                                                                                                     |                                                                                                                                                                                                                                                                                                                                                                                                                                                                     |                                                                                                                                                                                          |
| 20 |                                                                   |                                                                |                                                                                                                                                                     |                                                                                                                                                                                                                                                                                                                                                                                                                                                                     |                                                                                                                                                                                          |
| 21 |                                                                   |                                                                |                                                                                                                                                                     |                                                                                                                                                                                                                                                                                                                                                                                                                                                                     |                                                                                                                                                                                          |
| 22 |                                                                   |                                                                |                                                                                                                                                                     |                                                                                                                                                                                                                                                                                                                                                                                                                                                                     |                                                                                                                                                                                          |
| 23 |                                                                   |                                                                |                                                                                                                                                                     |                                                                                                                                                                                                                                                                                                                                                                                                                                                                     |                                                                                                                                                                                          |
| 24 |                                                                   |                                                                |                                                                                                                                                                     |                                                                                                                                                                                                                                                                                                                                                                                                                                                                     |                                                                                                                                                                                          |
| 25 |                                                                   |                                                                |                                                                                                                                                                     |                                                                                                                                                                                                                                                                                                                                                                                                                                                                     |                                                                                                                                                                                          |
| 26 |                                                                   |                                                                |                                                                                                                                                                     |                                                                                                                                                                                                                                                                                                                                                                                                                                                                     |                                                                                                                                                                                          |
| 27 |                                                                   |                                                                |                                                                                                                                                                     |                                                                                                                                                                                                                                                                                                                                                                                                                                                                     |                                                                                                                                                                                          |
| 28 |                                                                   |                                                                |                                                                                                                                                                     |                                                                                                                                                                                                                                                                                                                                                                                                                                                                     |                                                                                                                                                                                          |
| 29 |                                                                   |                                                                |                                                                                                                                                                     |                                                                                                                                                                                                                                                                                                                                                                                                                                                                     |                                                                                                                                                                                          |
| 30 |                                                                   |                                                                |                                                                                                                                                                     |                                                                                                                                                                                                                                                                                                                                                                                                                                                                     |                                                                                                                                                                                          |
| 31 | <b>Naylor et al. 2009 [40]</b>                                    | 14-15 year old pupils (n=416; 2 x schools).                    | To explore whether teaching adolescents about mental health would result in gains in knowledge and empathy.                                                         | Mental health lessons. Topics included: stress, learning disability, depression, suicide / self-harm, eating disorders, and bullying using methods such as discussion, role playing and internet searching.                                                                                                                                                                                                                                                         | Six 50 min weekly lessons delivered by 7 group tutors from pastoral care who attended a 1-day training from researchers.                                                                 |
| 32 | <b>(Greater London, England)</b>                                  |                                                                |                                                                                                                                                                     |                                                                                                                                                                                                                                                                                                                                                                                                                                                                     |                                                                                                                                                                                          |
| 33 |                                                                   |                                                                |                                                                                                                                                                     |                                                                                                                                                                                                                                                                                                                                                                                                                                                                     |                                                                                                                                                                                          |
| 34 |                                                                   |                                                                |                                                                                                                                                                     |                                                                                                                                                                                                                                                                                                                                                                                                                                                                     |                                                                                                                                                                                          |
| 35 |                                                                   |                                                                |                                                                                                                                                                     |                                                                                                                                                                                                                                                                                                                                                                                                                                                                     |                                                                                                                                                                                          |
| 36 |                                                                   |                                                                |                                                                                                                                                                     |                                                                                                                                                                                                                                                                                                                                                                                                                                                                     |                                                                                                                                                                                          |
| 37 |                                                                   |                                                                |                                                                                                                                                                     |                                                                                                                                                                                                                                                                                                                                                                                                                                                                     |                                                                                                                                                                                          |
| 38 |                                                                   |                                                                |                                                                                                                                                                     |                                                                                                                                                                                                                                                                                                                                                                                                                                                                     |                                                                                                                                                                                          |
| 39 |                                                                   |                                                                |                                                                                                                                                                     |                                                                                                                                                                                                                                                                                                                                                                                                                                                                     |                                                                                                                                                                                          |
| 40 |                                                                   |                                                                |                                                                                                                                                                     |                                                                                                                                                                                                                                                                                                                                                                                                                                                                     |                                                                                                                                                                                          |
| 41 | <b>Stallard et al., 2013 [41]</b>                                 | 12-16 year old pupils (n=5030; 8 x schools, 28 x year groups). | To assess effects of classroom based CBT on symptoms of depression and in relation to other aspects of psychological wellbeing and specific demographic sub-groups. | 'RAP-UK: Resourceful Adolescent Programme'. A depression prevention programme based on CBT and interpersonal therapy principles adapted to fit the UK curriculum. Key elements include: personal strengths, helpful thinking, keeping calm, problem solving, support networks and keeping the peace. Students complete workbooks as they progress.                                                                                                                  | Nine 50-60 min manualised lessons delivered within the PSHE curriculum by two trained facilitators external to the school. Two booster sessions offered to schools at 6 month follow up. |
| 42 | <b>(Bath, N.E. Somerset, Wiltshire, Nottinghamshire, England)</b> |                                                                |                                                                                                                                                                     |                                                                                                                                                                                                                                                                                                                                                                                                                                                                     |                                                                                                                                                                                          |
| 43 |                                                                   |                                                                |                                                                                                                                                                     |                                                                                                                                                                                                                                                                                                                                                                                                                                                                     |                                                                                                                                                                                          |
| 44 |                                                                   |                                                                |                                                                                                                                                                     |                                                                                                                                                                                                                                                                                                                                                                                                                                                                     |                                                                                                                                                                                          |
| 45 |                                                                   |                                                                |                                                                                                                                                                     |                                                                                                                                                                                                                                                                                                                                                                                                                                                                     |                                                                                                                                                                                          |
| 46 |                                                                   |                                                                |                                                                                                                                                                     |                                                                                                                                                                                                                                                                                                                                                                                                                                                                     |                                                                                                                                                                                          |
| 47 |                                                                   |                                                                |                                                                                                                                                                     |                                                                                                                                                                                                                                                                                                                                                                                                                                                                     |                                                                                                                                                                                          |
| 48 |                                                                   |                                                                |                                                                                                                                                                     |                                                                                                                                                                                                                                                                                                                                                                                                                                                                     |                                                                                                                                                                                          |
| 49 |                                                                   |                                                                |                                                                                                                                                                     |                                                                                                                                                                                                                                                                                                                                                                                                                                                                     |                                                                                                                                                                                          |
| 50 |                                                                   |                                                                |                                                                                                                                                                     |                                                                                                                                                                                                                                                                                                                                                                                                                                                                     |                                                                                                                                                                                          |
| 51 |                                                                   |                                                                |                                                                                                                                                                     |                                                                                                                                                                                                                                                                                                                                                                                                                                                                     |                                                                                                                                                                                          |
| 52 |                                                                   |                                                                |                                                                                                                                                                     |                                                                                                                                                                                                                                                                                                                                                                                                                                                                     |                                                                                                                                                                                          |
| 53 |                                                                   |                                                                |                                                                                                                                                                     |                                                                                                                                                                                                                                                                                                                                                                                                                                                                     |                                                                                                                                                                                          |
| 54 |                                                                   |                                                                |                                                                                                                                                                     |                                                                                                                                                                                                                                                                                                                                                                                                                                                                     |                                                                                                                                                                                          |
| 55 |                                                                   |                                                                |                                                                                                                                                                     |                                                                                                                                                                                                                                                                                                                                                                                                                                                                     |                                                                                                                                                                                          |
| 56 |                                                                   |                                                                |                                                                                                                                                                     |                                                                                                                                                                                                                                                                                                                                                                                                                                                                     |                                                                                                                                                                                          |

1  
2  
3  
4  
5  
6  
7  
8  
9  
10  
11  
12  
13  
14  
15  
16  
17  
18  
19  
20  
21  
22  
23  
24  
25  
26  
27  
28  
29  
30  
31  
32  
33  
34  
35  
36  
37  
38  
39  
40  
41  
42  
43  
44  
45  
46  
47  
48  
49  
50  
51  
52  
53  
54  
55  
56  
57  
58  
59  
60

299 **EFFECTIVENESS OF INTERVENTIONS**

300 An overview of study characteristics and outcomes can be found in Tables 2 and  
301 3.

302 **Data collection and measurement**

303 Studies varied widely in their use of measures. Measures used to rate  
304 depressive symptoms included the Children's Depression Inventory (CDI) [36],  
305 the Short Mood and Feelings Questionnaire (SMFQ) [39, 41] and the Center for  
306 Epidemiological Studies - Depression Scale (CES-D) [38]. Measures used to rate  
307 anxiety included the Revised Children's Anxiety and Depression Scale (RCADS)  
308 [34, 41], Revised Children's Manifest Anxiety Scale (RCMAS) [36], Penn State  
309 Worry questionnaire [41] and the Spence anxiety scale [30,32,33]. Measures used  
310 to capture different methods of coping related to symptoms of anxiety or  
311 depression included: Children's Automatic Thoughts Scale (CATS) [41], Coping  
312 Strategy Indicator (CSI) [32], Sentence Completion for Events in the Past Test  
313 (SCEPT) [39], and Perceived Stress Scale (PSS) [38]. Two studies used measures  
314 related specifically to wellbeing or resilience: Warwick-Edinburgh Mental  
315 Wellbeing Scale (WEMWBS) [38] and the Resilience Scale [37] and others used  
316 measures related to self-esteem [33,34,41] and life satisfaction [35]. The  
317 Strength and Difficulties Questionnaire (SDQ) was the most commonly used  
318 measure said to rate behavioural, emotional difficulties and overall functioning  
319 and either the child, parent or teacher version was used in six of the twelve  
320 studies [30,31,33,36,37,40]. Studies varied according to the length of follow up  
321 ranging from 4 weeks [37], to 2 years [41]. Four of the twelve studies sought to  
322 obtain qualitative, as well as quantitative data [30,35,37,41]. However, it was  
323 beyond the scope of this paper to comment on qualitative findings.

324 Due to the heterogeneity of studies, the effectiveness of each  
325 intervention approach will be discussed in turn. Overall, results suggested a  
326 trend whereby higher quality studies reported less positive effects.

327 **Studies trialling bespoke mental health education programmes (n=3;**  
328 **[40,37,35] - all in secondary schools).**

329 Two studies found small ( $d=0.11-0.22$ ) but significant improvements in  
330 total and subscale SDQ scores for those that received mental health education.



1           331    However, of those, it is noteworthy that Chisholm et al. [37] did not employ a  
2  
3           332    non-intervention condition. Boniwell et al. [35] trialled a bespoke intervention  
4           333    based on Positive Psychology principles and found a decrease in outcomes of life  
5           334    satisfaction and an increase in negative affect for both groups. However, this  
6           335    was less so for the intervention group ( $d=-0.24$  compared to  $d=-0.79$ ) which was  
7           336    interpreted as the intervention having a ‘buffering effect’ at a time of stress for  
8           337    the pupils.

9  
10  
11  
12  
13           338    **Studies trialling CBT-based interventions** [ $n= 8$ ; 30-34,36,39,41]. These are  
14           339    described by setting (Primary and then Secondary).

15  
16  
17           340    *Primary schools*

18  
19           341           All primary-school based studies trialled interventions pertaining to  
20           342    altering thinking styles based on CBT principles. Four studies, three of which  
21           343    employed a control arm, reported statistically positive outcomes on anxiety-  
22           344    related measures following interventions including FRIENDS [33,34], ‘Think Feel  
23           345    Do’ [30] and locally developed CBT programmes [32] with larger effects for  
24           346    those in ‘high risk’ groups ( $d=-1.26$ ; [33] - no control arm). Methodological issues  
25           347    such as a small sample size and significant group differences at baseline  
26           348    ( $n=13$ ;[30]), failure to include those lost to follow-up in analysis [32], lack of  
27           349    controls [33], and small effect sizes for universal samples ( $d=0.01 - 0.2$ ) [34]  
28           350    should be noted when taking inference from those results. Mixed results were  
29           351    found in relation to delivery, with stronger effects found in interventions led by  
30           352    health professionals ( $d=0.2$ ) versus school staff ( $d=0.02$ ) [34], or no difference  
31           353    between psychologist or teacher-led interventions [32]. A sufficiently powered,  
32           354    good-quality study evaluating the use of PATHS within the curriculum found few,  
33           355    small significant results ( $d = 0.06 - 0.14$ ; teacher-rated intervention measure) at  
34           356    12-month follow up, and no effects on any measure at 24-month follow up [31].

35           357    *Secondary schools*

36           358           Fewer significant outcomes were found in trials based within secondary  
37           359    school populations. Small ( $d=0.093$ ), but short-lived positive outcomes were  
38           360    found on the CDI for those in the UKRP intervention [36]. Mixed results were  
39           361    found for those in the UK-RAP intervention, with results indicating some  
40           362    beneficial and also potentially negative outcomes [41] although all with small

1 363 effect sizes. Both were high quality, longitudinal, well-powered studies  
2  
3 364 employing robust methodologies. Further, no effects were found in the CBT  
4  
5 365 group when compared with as-usual controls or other treatments in a smaller  
6  
7 366 study looking at mechanisms of change [39]. In the same study, a behavioural  
8  
9 367 intervention (TRY) was found to have positive effects on reward-seeking  
10  
11 368 behaviour and SMFQ measure ( $d=-0.8$ ) when compared with other treatments;  
12  
13 369 however, this finding was not confirmed when compared with PHSE-as-usual  
14  
15 370 controls.

15 371 **Studies using mindfulness-based interventions** (n=2; [38,39] - both in  
16  
17 372 secondary schools).

18  
19 373 Positive outcomes were found in a feasibility study evaluating a  
20  
21 374 mindfulness-based intervention [38] which yielded statistically significant,  
22  
23 375 modest effects on both depression (CES-D:  $d=-0.24$ ) and wellbeing (WEMWBS:  
24  
25 376  $d=0.15$ ) measures. Due to small sample sizes this study was likely to be  
26  
27 377 underpowered; however, outcomes were sustained at 3 months follow up and  
28  
29 378 were associated with greater mindfulness practice. No significant outcomes were  
30  
31 379 found in a smaller study trialling MBCT on measures of mood (SMFQ) or reward-  
32  
33 380 seeking [39].

34  
35  
36  
37  
38  
39  
40  
41  
42  
43  
44  
45  
46  
47  
48  
49  
50  
51  
52  
53  
54  
55  
56  
57  
58  
59  
60 381



Table 2. Design and outcome characteristics of primary-school based studies.

| Study (% quality rating)                        | Study Design                                                                                                                                                                       | Measures                                                                                                                                              | Follow-up                                                                  | Effects / Outcomes                                                                                                                                                                                                                                                                                                                                                         |
|-------------------------------------------------|------------------------------------------------------------------------------------------------------------------------------------------------------------------------------------|-------------------------------------------------------------------------------------------------------------------------------------------------------|----------------------------------------------------------------------------|----------------------------------------------------------------------------------------------------------------------------------------------------------------------------------------------------------------------------------------------------------------------------------------------------------------------------------------------------------------------------|
| <b>Attwood et al., 2012</b><br>[30]<br>(34%)    | Randomised pre-post intervention evaluation using opportunistic sample. No blinding or randomisation procedure reported. 'cCBT' (n=6) x control group (n=7).                       | <ul style="list-style-type: none"> <li>• SCAS - Parent &amp; Child version.</li> <li>• SDQ - Parent version.</li> <li>• Focus groups (n=8)</li> </ul> | Baseline; 6-weeks post intervention.                                       | Significant reduction in SCAS-C 'social' (d=0.49*) and 'general anxiety' (d=0.48*) subscales (NB: Intervention group significantly higher on SCAS at baseline). No effects on parent rated measures.                                                                                                                                                                       |
| <b>Berry et al., 2016</b><br>[31]<br>(68.8%)    | Randomised controlled trial; web randomisation system.<br>29 schools 'PATHS' intervention x 27 schools WL Control. <sup>1</sup>                                                    | <ul style="list-style-type: none"> <li>• SDQ - teacher version.</li> <li>• PATHS teacher rating scale (PTRS).</li> <li>• T-POT.</li> </ul>            | Baseline; 12 month post-intervention; 24 month post intervention.          | No differences on SDQ at 12-month F-up. Some significant results on subscales of PTRS at 12 month f-up (Social competence: d=0.09*; Aggression: d=0.14*; Inattention: d=-0.06*; Peer relations: -0.10*). Not maintained at 24 month follow up.                                                                                                                             |
| <b>Collins et al., 2013</b><br>[32]<br>(46.9%)  | Randomised 3 x 3 mixed design. No randomisation procedure reported.<br>Psychologist led anxiety intervention (n=103) x Teacher led anxiety intervention (n=79) x Controls (n=135). | <ul style="list-style-type: none"> <li>• CSI</li> <li>• SCAS -Child version administered by teachers.</li> </ul>                                      | Baseline; post-intervention; (within 3 weeks of end); 6 months follow up.  | Improvement in psychologist-led and teacher-led groups on SCAS-C (d=0.41*; d=0.31*) & CSI 'Avoidance' (d=0.31*; d=0.31*) and 'problem solving' (d=-0.66*; d=0.52*) subscales. No difference between psychologist or teacher-led groups. SCAS-C outcomes maintained at 6 months follow up (d=0.39*; d=0.39*). NB: Those lost to follow up (n=155) not included in analysis. |
| <b>Stallard et al., 2007</b><br>[33]<br>(43.4%) | Pre- post evaluation of pupils (n=106) from 3 schools taking part in the FRIENDS intervention.<br>No controls employed.                                                            | <ul style="list-style-type: none"> <li>• SCAS-Child version.</li> <li>• CFSEQ.</li> </ul>                                                             | 'T1': 6 month prior; 'T2': prior to intervention; 'T3': 3-month follow-up. | Improvements in SCAS (d=-0.50*) and CFSEQ (d=0.58*) from T1 to T3 for whole sample; not between T2 and T3 (across intervention). Improvements on both measures (d=-1.26*; d=-1.27*) for 'high risk' group between T2-T3.                                                                                                                                                   |

|                                                    |                                                                                                                                                                             |                                                                                                                                                                                                                                                                                                        |                                                     |                                                                                                                                                                                                                                                                                                    |
|----------------------------------------------------|-----------------------------------------------------------------------------------------------------------------------------------------------------------------------------|--------------------------------------------------------------------------------------------------------------------------------------------------------------------------------------------------------------------------------------------------------------------------------------------------------|-----------------------------------------------------|----------------------------------------------------------------------------------------------------------------------------------------------------------------------------------------------------------------------------------------------------------------------------------------------------|
| <p><b>Stallard et al., 2014 [34]</b><br/>(75%)</p> | <p>Cluster randomised controlled trial randomised through computer tool.</p> <p>Health-led FRIENDS (n=489) x School led FRIENDS (n=472) x Controls (n=401).<sup>1</sup></p> | <ul style="list-style-type: none"> <li>• RCADS 30 - child &amp; parent.</li> <li>• Penn State Worry Questionnaire.</li> <li>• RSES.</li> <li>• Bully / victim questionnaire.</li> <li>• Subjective wellbeing assessment.</li> <li>• SDQ- Parent version; teachers completed 'Impact scale'.</li> </ul> | <p>Baseline;6 months f-up; 12 months follow-up.</p> | <p>Improvement on total RCADS (d=0.20*) and social (d=-0.09*) &amp; general anxiety subscales (d=-0.20*) - not depression. Smaller effect sizes in school led group (d=0.02*; d=0.11*; d=0.01*);. No statistical improvements on secondary outcome measures or teacher / parent rating scales.</p> |
|----------------------------------------------------|-----------------------------------------------------------------------------------------------------------------------------------------------------------------------------|--------------------------------------------------------------------------------------------------------------------------------------------------------------------------------------------------------------------------------------------------------------------------------------------------------|-----------------------------------------------------|----------------------------------------------------------------------------------------------------------------------------------------------------------------------------------------------------------------------------------------------------------------------------------------------------|

<sup>1</sup> Study sufficiently powered to detect change. <sup>2</sup> Power calculation provided but proportion lost to follow up (>15%) reduced sample required for adequate power. \*Significant at p<0.5 level.

SCAS = Spence Children's Anxiety Scale; SDQ – Strength and Difficulties Questionnaire; PATHS = Promoting Alternative Thinking Strategies; PTRS = Paths teacher rating scale; T-POT = Teacher Pupil Observation Tool; CFSEQ = Culture-free Self-esteem questionnaire; RCADS = Revised Child Anxiety and Depression Scale; CSI = Coping Strategy Indicator

Table 3. Design and outcome characteristics of Secondary school-based studies.

| Study (% quality rating)                           | Study Design                                                                                                                                                                                            | Measures                                                                                                                                                                                                                                   | Follow-up                                                                           | Effects / outcomes                                                                                                                                                                                                                                                                                                                                                            |
|----------------------------------------------------|---------------------------------------------------------------------------------------------------------------------------------------------------------------------------------------------------------|--------------------------------------------------------------------------------------------------------------------------------------------------------------------------------------------------------------------------------------------|-------------------------------------------------------------------------------------|-------------------------------------------------------------------------------------------------------------------------------------------------------------------------------------------------------------------------------------------------------------------------------------------------------------------------------------------------------------------------------|
| <b>Boniwell et al. 2016</b><br>[35]<br><br>(37.5%) | Non-randomised control group pre-post design.<br><br>'Personal Wellbeing' intervention group (n=211) x control group (n=85).                                                                            | <ul style="list-style-type: none"> <li>• SLSS.</li> <li>• MSLSS.</li> <li>• PNASC.</li> <li>• Qualitative interviews.</li> </ul>                                                                                                           | Baseline; Post-intervention (10 month f-up)                                         | No significant improvement on SLSS or MSLSS. Decrease in 'satisfaction with school'(d=0.4*) and 'friends' (d=-0.17) scores for whole sample. Decrease in positive affect for both intervention and control groups (d=-0.24*; -0.79*); increase in negative affect (d=0.54*) for control group. NB: Those lost to follow up (n=103) not accounted for in analysis.             |
| <b>Challen et al. 2014</b><br>[36]<br><br>(78.1%)  | Non-randomised pragmatic controlled trial.<br><br>UKRP intervention (n=1016) group x Control (n=1894) group. <sup>1</sup>                                                                               | <ul style="list-style-type: none"> <li>• CDI.</li> <li>• RCMAS.</li> <li>• SDQ.</li> </ul>                                                                                                                                                 | Baseline; post intervention (4-9 months); 1 yr follow-up; 2 year follow-up.         | Small significant impact on CDI post-intervention (d=0.093*); not maintained at 1 or 2 years follow up. No significant effects on RCMAS or SDQ scores.                                                                                                                                                                                                                        |
| <b>Chisholm et al. 2016</b><br>[37]<br><br>(75%)   | Pragmatic cluster randomised controlled trail, randomised by independent researcher.<br><br>'Contact and MH Education' (n=354) group x MH Education (n=303) group. <sup>2</sup> No 'as usual' controls. | <ul style="list-style-type: none"> <li>• RIBS (not validated for adolescents).</li> <li>• MAKs (not validated for adolescents).</li> <li>• SDQ.</li> <li>• Resilience scale.</li> <li>• Helpseeking Q.</li> <li>• Focus groups.</li> </ul> | Baseline - 2 weeks prior to intervention day;<br><br>2 weeks post-intervention day. | Statistical sig. improvements on several scales post intervention day for both groups - 'contact and education' and 'education only': Attitudinal based stigma (d=0.23*; d=0.25*), knowledge based stigma (d=0.54*; d=0.59*), mental health literacy (d=0.05; d=0.13*); emotional wellbeing (d=0.16*; d=0.14*), and resilience (d=0.07; d=0.22*). No change in 'helpseeking'. |

<sup>1</sup> Study sufficiently powered to detect change.

<sup>2</sup> Power calculation provided but proportion lost to follow up (>15%) reduced sample required for adequate power. \*statistically significant at p < 0.05 level.

SLSS – Student’s Life Satisfaction Scale; MSLSS = Multidimensional Students Life Satisfactions Scale; PNASC = Positive and Negative Affect Schedule for Children; CDI = Children’s Depression Inventory; RCMAS = Revised Children’s Manifest Anxiety Scale; SDQ = Strength and Difficulties Questionnaires; RIBS = Reported and Intended Behaviour Scale; MAKs = Mental Health Knowledge Schedule; WEMWBS = Warwick Edinburgh Mental Wellbeing Scale;

|                                                   |                                                                                                                                                                                     |                                                                                                                                                                                                                                       |                                                                                  |                                                                                                                                                                                                                                                                                                                                                                                                                                                                       |
|---------------------------------------------------|-------------------------------------------------------------------------------------------------------------------------------------------------------------------------------------|---------------------------------------------------------------------------------------------------------------------------------------------------------------------------------------------------------------------------------------|----------------------------------------------------------------------------------|-----------------------------------------------------------------------------------------------------------------------------------------------------------------------------------------------------------------------------------------------------------------------------------------------------------------------------------------------------------------------------------------------------------------------------------------------------------------------|
| <p><b>Kuyken et al. 2013 [38]</b><br/>(59%)</p>   | <p>Non-randomised controlled feasibility study. MiSP intervention group (n=256) x control (n=266).</p>                                                                              | <ul style="list-style-type: none"> <li>• WEMWBS.</li> <li>• PSS.</li> <li>• CES-D.</li> <li>• Mindfulness practice.</li> </ul>                                                                                                        | <p>Baseline; Post-intervention (9 weeks); 3 month follow-up.</p>                 | <p>Lower depression scores post-intervention (d=-0.29*). Improvement on all measures at 3 month follow-up (WEMWBS: d=0.15*; PSS: d=-0.09*; CES-D: d=-0.24*). Mindfulness practice significantly associated with greater gains across all measures (unable to calculate E.S.).</p>                                                                                                                                                                                     |
| <p><b>Rice et al. 2015 [39]</b><br/>(50%)</p>     | <p>Non-randomised longitudinal design with three intervention conditions.<br/><br/>TRY intervention group (n=50) x CBT group (n=53) x MBCT group (n=54) x PHSE controls (n=99).</p> | <ul style="list-style-type: none"> <li>• SMFQ.</li> <li>• CGT to measure reward seeking.</li> <li>• DASC and corresponding response time.</li> <li>• SCEPT to measure overgeneral memory.</li> </ul>                                  | <p>Baseline; 9 week follow-up.</p>                                               | <p>Statistical sig. changes in reward seeking in TRY group (d=0.12*); no change after CBT or MBCT. No statistically significant decrease in SMFQ across groups compared to PHSE controls. When comparing treatment groups only, TRY showed statistical reduction in SMFQ when compared with MBCT and CBT (d=-0.8*); reward-seeking moderated reductions in SMFQs scores (d=1.62*).</p>                                                                                |
| <p><b>Naylor et al. 2009 [40]</b><br/>(56.3%)</p> | <p>Non-randomised pre-post control group study. MH intervention group (n=175) x Control group (n=242).<sup>1</sup></p>                                                              | <ul style="list-style-type: none"> <li>• Mental Health Questionnaire (unvalidated).</li> <li>• SDQ.</li> </ul>                                                                                                                        | <p>Baseline (1 week before intervention); 6 months post-intervention.</p>        | <p>Improvement in MHQ with regards to awareness of depression causes (d=0.21*) and bullying (d=0.31*). Changes in specific SDQ subscales: 'conduct' (d=0.22*) and 'prosocial' (d=0.11*) but not on total difficulties.</p>                                                                                                                                                                                                                                            |
| <p><b>Stallard et al. 2013</b><br/>(81.3%)</p>    | <p>Cluster randomised controlled trial, randomised by computer.<br/><br/>UK-RAP intervention group (n=1753) x Attention controls (n=1673) x PHSE controls (n=1604)<sup>1</sup></p>  | <ul style="list-style-type: none"> <li>• SMFQ.</li> <li>• CATS.</li> <li>• RSES.</li> <li>• RCADS.</li> <li>• School connectedness.</li> <li>• Attachment Questionnaire.</li> <li>• European Quality of Life-5 dimensions.</li> </ul> | <p>Screening - SMFQ only; Baseline; 6 months follow-up; 12 months follow-up.</p> | <p>No significant effect on SMFQ at 12 months follow-up. Some effect of intervention on bullying status at 12 months, and Cannabis use at 6mo and 12 months follow-up. Intervention less useful than usual PHSE or attention controls for panic; less useful than usual PHSE on CATS 'personal failure' and general anxiety. Signs of benefits and harm of intervention found, all reported to be small effect sizes (data unavailable to calculate effect size).</p> |

PSS = Perceived Stress Scale; CES-D = Center for Epidemiologic Studies Depression Scale; SMFQ = Short Mood and Feelings Questionnaire; CGT = Cambridge Gambling Task; DASC = Dysfunctional Attitudes Scale for Children; SCEPT = Sentence completion for Events from the Past (SCEPT); CATS = Children's Automatic Thoughts Scale; RSES = Rosenberg Self Esteem Scale.

1  
2  
3  
4  
5  
6  
7  
8  
9  
10  
11  
12  
13  
14  
15  
16  
17  
18  
19  
20  
21  
22  
23  
24  
25  
26  
27  
28  
29  
30  
31  
32  
33  
34  
35  
36  
37  
38  
39  
40  
41  
42  
43  
44  
45  
46  
47

<sup>1</sup> Study sufficiently powered to detect change. <sup>2</sup> Power calculation provided but proportion lost to follow up (>15%) reduced sample required for adequate power. \*Significant at p<0.5 level.

For peer review only

## 382 Implementation Issues

383 Common issues relating to implementation were found across all studies.

### 384 *Fidelity*

385 Fidelity to intervention delivery was highlighted as an issue in terms of both  
386 measurement and outcome. Studies used self-rated fidelity methods [32], external  
387 fidelity ratings on a proportion of sessions [31,34,36,37,41] or no fidelity rating  
388 methods reported at all. Studies commented variably on the possible effect of  
389 fidelity and ‘treatment dosage’ on outcomes. In Stallard et al.’s [37] study the  
390 health-led condition with 100% fidelity (i.e. administered all pieces of homework  
391 and activity tasks), was associated with significantly better outcomes than the  
392 school-led group who achieved 60-80% fidelity. ‘High quality’ workshops were also  
393 found to be related to greater declines in CDI measures [36]. Conversely, Berry et  
394 al. [31] found that fidelity (when applying an arbitrary ‘80%’ rate of ‘high’ fidelity)  
395 was not found to be related to outcome.

### 396 *Attrition*

397 Investment from schools was raised as an issue as demonstrated by school  
398 participation and attrition [31,41] and failure to administer follow up measures as  
399 per study procedures [32,35]. All studies, with the exception of Stallard et al. [41]  
400 provided little information about school or participant characteristics of those who  
401 dropped out. This confounding factor may have positively biased results. For  
402 instance, in Kuyken et al’s [38] study, teachers who delivered the mindfulness  
403 intervention had been invested in the intervention for approximately 2 years  
404 before the beginning of the study and attended regular supervision, demonstrating  
405 good motivation throughout the study which found positive outcomes.

### 406 *Costs*

407 Two studies actively explored health economic costs involved [31,41]. Cost-  
408 effectiveness was not calculated by Berry et al. [31] due to lack of impact, and  
409 Stallard et al. [41] concluded that the intervention was not cost-effective. Of  
410 note, both studies may have sustained high costs due to employing external  
411 facilitators to lead the intervention rather than teachers [41] and hiring ‘coach  
412 consultants’ to monitor delivery [31].

1  
2  
3 413 **DISCUSSION**

4  
5 414 This review aimed to explore the effectiveness and study quality of  
6 415 universally delivered school-based interventions within the UK which aim to  
7 416 promote mental and emotional wellbeing, or prevent mental ill health. Several  
8 417 clear conclusions can be drawn from this review, while other issues require further  
9 418 clarity from future research.

10  
11  
12  
13  
14 419

15  
16 420 ***How effective are universal school-based interventions in the UK that promote***  
17  
18 421 ***mental health, emotional wellbeing, or psychological resilience?***

19  
20 422 Based on the studies included in this review, the effectiveness of universal  
21 423 school based interventions remains mixed, and at best, modest. Where there were  
22 424 several positive outcomes, effect sizes were small and methodological issues  
23 425 rendered many results to be interpreted with caution. This prudent finding echoes  
24 426 the somewhat mixed results from worldwide reviews [10 - 23], where while several  
25 427 positive evaluations exist, this finding is not consistent when applied across diverse  
26 428 settings and populations, which calls into question the overall generalisability of  
27 429 school based interventions in the literature to real world environments.

28  
29  
30 430 Notwithstanding, this current review focussing on UK schools only found that  
31 431 studies based in Primary schools seemed to find more encouraging results from  
32 432 CBT-based interventions on measures of anxiety, although most studies had  
33 433 methodological limitations relating to use of appropriate controls, and failure to  
34 434 include those lost to follow up in analysis. Positive results tended to fall in the  
35 435 older age range of Primary school pupils (9-12 years old).

36  
37  
38  
39  
40  
41  
42  
43  
44 436 Within the Secondary school population, the most positive results were  
45 437 obtained when delivering mental health education sessions, behavioural or  
46 438 mindfulness interventions. Two high powered, good quality studies evaluating CBT  
47 439 based interventions within secondary populations found few significant results and  
48 440 one study indicated possible detrimental impacts of the intervention compared to  
49 441 controls, although any effect sizes related to these findings were small.

50  
51  
52  
53  
54 442 It is curious that studies fail to detect promising effects in the older,  
55 443 secondary school, population. It could be argued that a 2 year follow-up is not



1  
2  
3 444 sufficient to truly detect change or prevention during the developmentally-  
4 445 sensitive time that is adolescence. Arguably, the demands placed on adolescents  
5 446 merely change in nature rather than impact over time. Adolescent psychosocial  
6 447 development [42] is particularly vulnerable as individuals are required to manage  
7 448 academic demands as they progress through their school career, navigate  
8 449 friendships, seek to develop self-identities and deal with the physiological changes  
9 450 that occur as they transition through puberty. It could be that the existence of  
10 451 such pervasive and fluctuating stressors juxtaposed with measurement issues,  
11 452 discussed below, contribute to the failure to detect significant results in secondary  
12 453 school populations. Or, that such interventions simply have less impact for this  
13 454 population.  
14  
15  
16  
17  
18  
19  
20  
21  
22

455

23  
24 456 ***What methodologies are being applied in UK schools when trialling***  
25 457 ***interventions and what is the quality of these studies?***  
26

27  
28 458 Methodological issues were predominant in this review. Only four of the  
29 459 studies were of 'excellent' quality and findings indicated a trend towards higher  
30 460 quality papers finding fewer positive results. Studies were weakened largely due to  
31 461 their lack of randomisation and blinding of researchers, and small sample sizes  
32 462 which likely rendered them underpowered to detect true effects.  
33  
34  
35

36 463 While it was encouraging that initial consenting rates were high and  
37 464 remained reasonable throughout, study quality would benefit from better  
38 465 reporting of those lost to follow up who, possibly, could be a population of  
39 466 particular interest when considering the objective of promoting mental and  
40 467 emotional wellbeing for all within the school setting. Further, statistical methods  
41 468 used to account for such missing data require careful consideration to ensure that  
42 469 more stringent and conservative methods - for example, intent-to-treat analyses -  
43 470 are applied in school-based research. Otherwise, studies that instead apply a  
44 471 'defined completers' or 'completers' analysis expose themselves to the risk of  
45 472 yielding false positives.  
46  
47  
48  
49  
50  
51  
52

53 473 Another issue was the use of controls. Few studies explicitly provided  
54 474 details of the content controls groups received. Some indicated that controls may  
55  
56  
57  
58  
59  
60

1  
2  
3 475 have already received materials available in the school around social and  
4 476 emotional wellbeing, which could reasonably have confounded results.  
5  
6 477 Additionally, considering the demographic data provided, it is unlikely that the  
7  
8 478 included studies accurately represent the cultural diversity of schools across the  
9  
10 479 UK, therefore caution should be taken when considering the generalizability of  
11 480 results.

12  
13 481 The last prominent issue highlighted in this study was the diverse use of  
14  
15 482 measures and length of follow up across studies, making it difficult to ascertain a  
16  
17 483 coherent picture of measurement and effects in the current research base.

18  
19 484 As commented in one study [36] and further afield [21], measurement issues  
20  
21 485 within universal populations are particularly problematic due to common floor  
22  
23 486 effects, particularly when using measures pertaining to the existence of mental  
24  
25 487 health conditions. As has been well-documented, demonstrating improvement in  
26  
27 488 'high risk' groups is somewhat easier as baseline scores are often elevated  
28  
29 489 providing scope for reduction [41]. Demonstrating change within a universal  
30  
31 490 population is therefore inherently more difficult and requires careful thought when  
32  
33 491 moving forward. Is it sufficient that the absence of a mental health condition  
34  
35 492 equates to greater wellbeing or resilience as suggested by Boniwell et al. [35], or  
36  
37 493 should researchers direct attention to explicitly measuring wellbeing and resilience  
38  
39 494 and mechanisms of change within such constructs in order to truly operationalise  
40  
41 495 factors relating to the prevention of mental health difficulties?

42  
43 496 Few studies in this review used wellbeing or resilience measures. However,  
44  
45 497 those that did [37, 38] found positive effects. While any meaning of these results  
46  
47 498 must be taken with caution due to methodological issues, this nevertheless  
48  
49 499 suggests that such measures are at least able to detect change within a universal  
50  
51 500 population.

52  
53 501 Only one study explored mechanisms of change [39] by using cognitive  
54  
55 502 reasoning tests when comparing several interventions, and found that a  
56  
57 503 behavioural intervention led to more reward-seeking and a reduction in mood  
58  
59 504 symptoms. It would be of value to explore this further given the  
60  
61 505 neurodevelopmental stage of early adolescence when frontal lobes are still  
62  
63 506 maturing and neuronal connections continue to grow [43]. Consequently, the

1  
2  
3 507 adolescent's ability to plan, problem solve and manipulate abstract information, as  
4 508 is arguably necessary in cognitive-based interventions, may be overridden by more  
5 509 disinhibited, emotionally driven impulses and the seeking of concrete rewards, as  
6 510 may be seen in earlier adolescence and would potentially explain increased  
7  
8 511 receptiveness to a behavioural rather than cognitive intervention.  
9  
10

11  
12 It could also be of value that future studies take a more holistic perspective  
13 512 of general wellbeing during evaluation of universal populations. Such indicators  
14 513 may include school attendance, exam completion, referrals rates to local CAMHS,  
15 514 academic outcomes, long-term mental and physical health outcomes, occupational  
16 515 or further education uptake, as well as important qualitative components.  
17  
18  
19

20 517

21  
22  
23 518 ***What are the identified barriers in delivering and evaluating universal school***  
24 519 ***based interventions?***  
25

26  
27 520 Implementation barriers relating to fidelity to intervention delivery and  
28 521 costs were also raised within this review. Variance in fidelity measurement to  
29 522 confirm reliable manualised delivery was a recurring issue, which is of particular  
30 523 salience when delivery has been consistently argued to be related to outcome  
31 524 [10,12]. Intervention delivery itself varied between studies where school staff or  
32 525 external researchers delivered the courses. While results were mixed when  
33 526 comparing the effectiveness of teacher-led versus externally-led interventions,  
34 527 overall within this review the results were neutral suggesting, at best, that there is  
35 528 no negative impact of teacher delivery. While issues relating to treatment fidelity  
36 529 may be more prominent with teacher delivery, considering sustainability, it could  
37 530 be argued that this would be the optimal approach in school settings, especially  
38 531 considering the financial costs involved in employing external facilitators as  
39 532 demonstrated by two studies in this review [31, 41]. Further, research has  
40 533 indicated that pupils prefer both that mental health education be delivered by  
41 534 someone with a thorough knowledge of the subject, and for it to be delivered by  
42 535 someone they know e.g., a teacher [44].  
43  
44  
45  
46  
47  
48  
49  
50  
51  
52

53 536 No study in this review explored the impact on any allied services such as  
54 537 CAMHS. For instance, it may be useful to audit local CAMHS referral-rates whilst  
55  
56  
57

1  
2  
3 538 reviewing the effectiveness of school-based interventions, and whether an increase  
4 539 or decrease in referrals would be observed. Considering the absence of reliable  
5  
6 540 positive outcomes at the individual level at this point, a systemic perspective  
7  
8 541 could be of value when considering any cost benefits to the wider health and social  
9  
10 542 care services.

11  
12 543 Further, it was unclear from the review what local or national political or  
13  
14 544 strategic drivers instigated each study, and indeed, the extent to which children  
15  
16 545 and young people were consulted in the process, design and delivery of the  
17  
18 546 interventions. It was outside the scope of this review to explore the qualitative  
19  
20 547 findings from the few studies that employed focus groups. Therefore, it is  
21  
22 548 recommended that future qualitative reviews of school-based research are  
23  
24 549 conducted in order to ensure that children's and young people's views as  
25  
26 550 stakeholders in this work are sufficiently represented.

## 25 551 **Limitations**

27  
28 552 This study was limited in its ability to source evaluations representative of  
29  
30 553 the entire UK as the majority of studies were based in England. While efforts were  
31  
32 554 made to source evaluations from elsewhere in the UK, the lack of validated  
33  
34 555 measures or application of pre-post methodology meant that such evaluations from  
35  
36 556 the 'grey literature' could not be included in this review. It should therefore be  
37  
38 557 noted that there is much relevant work being conducted in schools across the UK.  
39  
40 558 However, schools and local authorities should be urged to reliably evaluate their  
41  
42 559 valuable efforts and contribute to the published literature, thereby demonstrating  
43  
44 560 the important work being driven by teachers and policymakers nationwide.

45  
46 561 This study was also limited in its date source in that only studies from the  
47  
48 562 year 2000 were included in this review. While results from other systematic  
49  
50 563 reviews suggested that little relevant research was done in the UK before this  
51  
52 564 time, it could still be that some studies were missed due to this limit.

## 50 565 **Implications**

52  
53 566 This review highlighted the need to employ robust methodological designs  
54  
55 567 within school-based research in order for any effects to be interpreted  
56  
57 568 meaningfully. Measurement issues exist where they do not adequately detect

1  
2  
3 569 change in universal populations, and there is a wide variety of measures used  
4 570 ranging from ‘clinical’ to wellbeing measures. This review concludes that school-  
5  
6 571 based researchers across the UK should attempt to come together to discuss ways  
7  
8 572 to address this issue and improve coherence in the literature.

9  
10 573 An additional, imperative implication from this review is the proactive  
11  
12 574 inclusion and involvement of teachers in this work. As has been commented  
13  
14 575 elsewhere [45] without the ‘buy-in’ from teachers, any school-based intervention  
15  
16 576 is less likely to sustain or achieve positive outcomes. In a time of additional  
17  
18 577 pressures on teachers, the need to feel in control of initiatives is key. Of note, two  
19  
20 578 of the studies in this review included adult-focussed exercises for the teachers  
21  
22 579 themselves as an adjunct to the intervention training. This approach may go  
23  
24 580 further to assist teachers’ stress management and understanding of mental health  
25  
26 581 whilst attending to the needs of their pupils.

27

## 28 583 **Conclusions**

29  
30 584 The current evidence suggests there are neutral to small effects of  
31  
32 585 universal, school-based interventions in the UK that aim to promote emotional or  
33  
34 586 mental wellbeing or prevention of mental health difficulties. Whilst the real-world  
35  
36 587 limitations of conducting research in schools exists, robust, long-term  
37  
38 588 methodologies need to be attempted when conducting research in this area in  
39  
40 589 order to explore the longitudinal impact of school-based interventions on  
41  
42 590 wellbeing. Academic attainment, school attendance and rates of high-risk  
43  
44 591 presentations also need to be further explored. This requires adequate recording  
45  
46 592 of fidelity, the use of validated measures sensitive to mechanisms of change,  
47  
48 593 reporting of those lost to follow up and any adverse effects, and the use of  
49  
50 594 qualitative data to supplement quantitative outcomes. Interventions in the existing  
51  
52 595 UK-based literature include educational, behavioural, cognitive and mindfulness  
53  
54 596 components, each demonstrating variable results. Nevertheless, national and local  
55  
56 597 policy [25, 26, 27, 46] indicates that there remains an appetite to develop work in  
57  
58 598 this area in order to promote wellbeing outcomes for children and young people. In  
59  
60 599 this case, further research collaborations are required across the UK to robustly  
600 demonstrate any benefits for pupils or on the wider system.

1  
2  
3 601 **CONTRIBUTORSHIP**

4  
5 602 This piece of research was submitted in part fulfilment for a Doctorate  
6 603 degree in Clinical Psychology. KM (Dr Karen Mackenzie) was the main researcher  
7  
8 604 and responsible for developing the research questions, conducting the search  
9  
10 605 strategy and analysing results. CW (Professor Chris Williams) supervised this  
11  
12 606 research and acted as co-rater during the search process.

13  
14 607 **ACKNOWLEDGEMENTS**

15  
16 608 Many thanks to Dr Claire Adey (CA) who assisted in the quality rating  
17  
18 609 process.

19  
20 610 **COMPETING INTERESTS**

21  
22 611 CW is President of BABCP- the lead body for CBT in the UK, and a CBT  
23  
24 612 researcher and trainer. He is also author of a range of CBT-based resources  
25  
26 613 including some aimed at primary and secondary school populations. These are  
27  
28 614 available commercially as books, online courses, and classes. He receives royalty,  
29  
30 615 and is shareholder and director of a company that commercialises these resources.

31 616 **FUNDING STATEMENT**

32  
33 617 This research received no specific grant from any funding agency in the public,  
34  
35 618 commercial or not-for-profit sectors.

36  
37 619 **DATA SHARING**

38  
39 620 Supplementary data available upon request to the author.

40  
41 621 **FIGURE LEGEND**

42  
43 Figure 1: PRISMA flow diagram

44  
45 Table 1: Overview of interventions

46  
47 Table 2: Study design and outcomes - Primary schools

48  
49 Table 3: Study design and outcomes - Secondary schools

50  
51  
52  
53 622

54  
55 623

624 **REFERENCES**

- 625 1. Kieling C, Baker-Henningham H, Belfer M, et al. Child and adolescent mental  
626 health worldwide: evidence for action. *Lancet* 2011;378:1515-25.
- 627 2. Costello EJ, Mustillo S, Erkanli A, et al. Prevalence and development of  
628 psychiatric disorders in childhood and adolescence. *Arch Gen Psychiatry* 2003;  
629 60:837-44.
- 630 3. Kendall, P. C., Safford, S., Flannery-Schroeder, E., & Webb, A. Child anxiety  
631 treatment: Outcomes in adolescence and impact on substance abuse and  
632 depression at 7.4 year follow-up. *Journal of Consulting and Clinical Psychology*  
633 2004;72:276-287.
- 634 4. Collins, K. A., & Dozois, D. J. A. What are the active ingredients in preventative  
635 interventions for depression? *Clinical Psychology: Science and Practice*  
636 2008;15:313-330.
- 637 5. Patel V, Flisher AJ, Hetrick S, McGorry P. Mental health of young people: a  
638 global public-health challenge. *The Lancet* 2007;369(9569):1302-13.
- 639 6. World Health Organization. Atlas: Child and Adolescent Mental Health  
640 Resources: Global Concerns, Implications for the Future. WHO, 2005.
- 641 7. Masia-Warner, C., Nangle, D. W., & Hansen, D. J. Bringing evidence-based child  
642 mental health services to the schools: General issues and specific populations.  
643 *Education and Treatment of Children* 2006;29:165-172.
- 644 8. Domitrovich CE, Bradshaw CP, Greenberg MT, Embry D, Poduska JM, Ialongo NS.  
645 Integrated models of school-based prevention: logic and theory. *Psychology in*  
646 *Schools*. 2010;47(1):71-88.
- 647 9. Vostanis, P., Humphrey, N., Fitzgerald, N., Deighton, J., & Wolpert, M. (2013).  
648 How do schools promote emotional wellbeing among their pupils? Findings from a  
649 national scoping survey of mental health provision in English schools. *Child and*  
650 *Adolescent Mental Health* 2013;18:151-157.



- 1  
2  
3 651 10. Durlak, JA, Weissberg, RP, Dymnicki, AB, Taylor, RD & Schellinger, KB. The  
4 652 Impact of Enhancing Students' Social and Emotional Learning: A Meta-Analysis of  
5 653 School-Based Universal Interventions. *Child Development* 2011;82(1):405-432.  
6  
7  
8 654 11. Wells, J, Barlow, J & Stewart-Brown. A systematic review of universal  
9 655 approaches to mental health promotion in school. *Health Education* 2003;103(4):  
10 656 197-220.  
11  
12  
13 657 12. Neil, A.L. & Christensen, H. Efficacy and effectiveness of school-based  
14 658 prevention and early intervention programs for anxiety. *Clinical Psychology Review*  
15 659 2009; 29(3):208-215.  
16  
17  
18 660 13. Mychailyszyn. M.P., Brodman, D.M., Read, K.L., et al. Cognitive Behavioural  
19 661 School-based interventions for anxious and depressed youth: a meta-analysis of  
20 662 outcomes. *Clinical Psychology Science and Practice* 2012;19:129-153.  
21  
22  
23 663 14. Weare, K & Nind, M. Mental health promotion and problem prevention in  
24 664 schools: what does the evidence say? *Health Promotion International* 2011;26(1):  
25 665 29-69.  
26  
27  
28 666 15. Merry, S., Hetrick, S., Cox, G.R., et al. Psychological and educational  
29 667 interventions for preventing depression in children and adolescents. *Cochrane*  
30 668 *Database of Systematic Reviews* 2011;12.DOI:10.1002/14651858.CD003380.pub3.  
31  
32  
33 669 16. Corrieri, S., Heider, D., Conrad, I., et al. School-based prevention programs for  
34 670 depression and anxiety in adolescence: a systematic review. *Health Promotion*  
35 671 *International* 2013;29(3):427-441.  
36  
37  
38 672 17. Spence, S.H., & Shortt, A.L. Research review: Can we justify widespread  
39 673 dissemination of universal based interventions for the preventions of depression  
40 674 among children and adolescents? *Journal of Child Psychology and Psychiatry*  
41 675 2007;48(6):526-542.  
42  
43  
44 676 18. Calear, al. & Christensen, H. Review of internet-based prevention and  
45 677 treatment programs for anxiety and depression in children and adolescents. *The*  
46 678 *Medical Journal of Australia* 2010;192(11):12-14.  
47  
48  
49  
50  
51  
52  
53  
54  
55  
56  
57  
58  
59  
60

- 1  
2  
3 679 19. Kavanagh, J., Oliver, S., Lorenc, T., et al. School based cognitive-behavioural  
4 680 interventions: A systematic review of effects and inequalities. *Health Sociology*  
5 681 *Review* 2009;18: 61-78.  
6  
7  
8 682 20. Stallard, P. School-based intervention for depression and anxiety in children  
9 683 and adolescents. *Evidence-based Mental Health* 2013;16(3):60-61.  
10  
11  
12 684 21. Reavley, N., Bassilos, B., Ryan, S., et al. Interventions to build resilience in  
13 685 Young People: a literature review. *Victorian Health Promotion Foundation* 2015.  
14 686 Melbourne.  
15  
16  
17 687 22. Sancassiani, F., Pintus, E., Holte, A., et al. Enhancing the Emotional and Social  
18 688 Skills of the Youth to promote their Wellbeing and Positive Development: A  
19 689 systematic review of Universal School-based Randomised Controlled Trials. *Clinical*  
20 690 *Practice & Epidemiology in Mental Health* 2015;11:21-40.  
21  
22  
23 691 23. National Institute of Clinical Excellence. *Promoting children's social and*  
24 692 *emotional well-being in primary education*. 2008. Retrieved from  
25 693 <http://www.nice.org.uk/guidance/index>. Accessed June 2016.  
26  
27  
28 694 24. Cheney, G., Schlosser, A., Nash, P., et al. Targeted group-based interventions  
29 695 in schools to promote emotional well-being: A systematic review. *Clinical Child*  
30 696 *Psychology & Psychiatry* 2014;19(3):412-438  
31  
32  
33 697 25. Department of Education. *Mental health and behaviour in schools:*  
34 698 *Departmental advice for school staff*. 2016.  
35 699 [www.nationalarchives.gov.uk/doc/open-government-licence/version/3](http://www.nationalarchives.gov.uk/doc/open-government-licence/version/3). Accessed  
36 700 June 2016.  
37  
38  
39 701 26. Education Scotland (no publication date). Curriculum for Excellence. *Health*  
40 702 *and Wellbeing Across Learning: Responsibilities for All. Experience and Outcomes*.  
41 703 [www.educationscotland.gov.uk/health\\_wellbeing\\_experiences\\_outcomes\\_tcm4-](http://www.educationscotland.gov.uk/health_wellbeing_experiences_outcomes_tcm4-540031.pdf)  
42 704 [540031.pdf](http://www.educationscotland.gov.uk/health_wellbeing_experiences_outcomes_tcm4-540031.pdf) Accessed June 2016.  
43  
44  
45 705 27. CYMRU. 'Thinking positively: Emotional health and well-being in schools and  
46 706 Early Years settings'. 2010 [www.wales.gov.uk/educationandskills](http://www.wales.gov.uk/educationandskills). Accessed June  
47 707 2016.  
48  
49  
50  
51  
52  
53  
54  
55  
56  
57  
58  
59  
60

- 1  
2  
3 708 28. Downs, S. H., & Black, N. The feasibility of creating a checklist for the  
4 709 assessment of the methodological quality both of randomized and non-randomized  
5 710 studies of health care interventions. *Journal of Epidemiological Community Health*  
6 711 1998;52:377-384.
- 7  
8  
9  
10 712 29. Popay, J., H. Roberts, A. Sowden, F et al. *Guidance on the Conduct of*  
11 713 *Narrative Synthesis in Systematic Reviews: Final Report*. Swindon: ESRC Methods  
12 714 Programme 2006.
- 13  
14  
15 715 30. Attwood, M., Meadows, S., Stallard, P., et al. Universal and targeted  
16 716 computerised cognitive behavioural therapy (Think, Feel, Do) for emotional health  
17 717 in schools: Results from two exploratory studies. *Child and Adolescent Mental*  
18 718 *Health* 2012;17(3):173-178.
- 19  
20  
21  
22 719 31. Berry. F., Axford, N., Blower, S., et al. The effectiveness and micro-costing  
23 720 analysis of a Universal, School based, Social-Emotional Learning programme in the  
24 721 UK: A cluster-randomised controlled trial. *School Mental Health* 2016;8:238-256.
- 25  
26  
27  
28 722 32. Collins, S., Woolfson, L. M., & Durkin, K. Effects on coping skills and anxiety of  
29 723 a universal school-based mental health intervention delivered in Scottish primary  
30 724 schools. *School Psychology International* 2013; 35(1):85-100.
- 31  
32  
33  
34 725 33. Stallard, P., Simpson, N., Anderson, S., et al. The FRIENDS Emotional Health  
35 726 Programme: Initial Findings from a School-Based Project. *Child & Adolescent*  
36 727 *Mental Health* 2007;12(1):32-37.
- 37  
38  
39 728 34. Stallard, P., Skyrabina, E., Taylor, G., et al. Classroom-based cognitive  
40 729 behaviour therapy (FRIENDS): A cluster randomised controlled trial to Prevent  
41 730 Anxiety in Children through Education in Schools (PACES). *The Lancet Psychiatry*  
42 731 2014;1(3):185-192.
- 43  
44  
45  
46 732 35. Boniwell. I., Osin, E.N., & Martinez, C. Teaching Happiness at school: non-  
47 733 randomised controlled mixed-methods feasibility study on the effectiveness of  
48 734 well-being lessons. *The Journal of Positive Psychology* 2016;11(1):85-98.
- 49  
50  
51  
52 735 36. Challen, A. R., Machin. S.J., & Gillham J.E. The UK Resilience Programme: a  
53 736 school-based universal nonrandomized pragmatic controlled trial. *Journal of*  
54 737 *Consulting & Clinical Psychology* 2014;82(1):75-89.

- 1  
2  
3 738 37. Chisholm, K. E., Patteron, P., Torgerson, C., et al. Impact of contact on  
4 739 adolescents' mental health literacy and stigma: the SchoolSpace cluster  
5  
6 740 randomised controlled trial. *BMC Open* 2016,6:e009435.  
7  
8 741 38. Kuyken, W., Weare, K., Obioha, C., et al. Effectiveness of the Mindfulness in  
9 742 Schools Programme: Non-randomised controlled feasibility study. *The British*  
10 743 *Journal of Psychiatry* 2013; 203(2):126-131  
11  
12  
13 744 39. Rice, F., Rawal, A., Riglin, L., et al. Examining reward-seeking, negative self-  
14 745 beliefs and over-general autobiographical memory as mechanisms of change in  
15 746 classroom prevention programs for adolescent depression. *Journal of Affective*  
16 747 *Disorders* 2015;186:320-327.  
17  
18  
19 748 40. Naylor, P., Cowie, H.E., Watters, S.J., et al. Impact of a mental health  
20 749 teaching programme on adolescents. *The British Journal of Psychiatry*  
21 750 2009;194:365-370.  
22  
23  
24 751 41. Stallard. P., Phillips. R., Montgomery, A.A., et al. A cluster RCT to determine  
25 752 the clinical effectiveness and cost-effectiveness of classroom-based cognitive-  
26 753 behavioural therapy (CBT) in reducing symptoms of depression in high-risk  
27 754 adolescents. *Health Technology Assessment* 2013;17(47).  
28  
29  
30 755 42. Erikson, Erik H. Identity, Youth and Crisis. New York: Norton. 1968.  
31  
32  
33 756 43. Spear, L.P. Adolescent Neurodevelopment. [Journal of Adolescent Health 2013;](#)  
34 757 [52\(2\):S7-13](#). doi:[10.1016/j.jadohealth.2012.05.006](#)  
35  
36  
37 758 44. Woolfson, R, Woolfson, L, Mooney, L, Bryce, D. Young people's views of mental  
38 759 health education in secondary schools: A Scottish study. *Journal of Child: care,*  
39 760 *health and development* 2008;35(6):790-798.  
40  
41  
42 761 45. Weare, K. Editorial: Child and adolescent mental health in schools. *Child and*  
43 762 *Adolescent Mental Health* 2015;20(2):6-8.  
44  
45  
46 763  
47  
48  
49 764 46. Department for Education, Department of Health and Social Care.  
50 765 Transforming children and young people's mental health: a Green paper.  
51 766 December 2017. <https://www.gov.uk/government/consultations/transforming->

1  
2  
3  
4  
5  
6  
7  
8  
9  
10  
11  
12  
13  
14  
15  
16  
17  
18  
19  
20  
21  
22  
23  
24  
25  
26  
27  
28  
29  
30  
31  
32  
33  
34  
35  
36  
37  
38  
39  
40  
41  
42  
43  
44  
45  
46  
47  
48  
49  
50  
51  
52  
53  
54  
55  
56  
57  
58  
59  
60

767 [children-and-young-peoples-mental-health-provision-a-green-paper](#) accessed June  
768 2018.

769

770

771

772

For peer review only

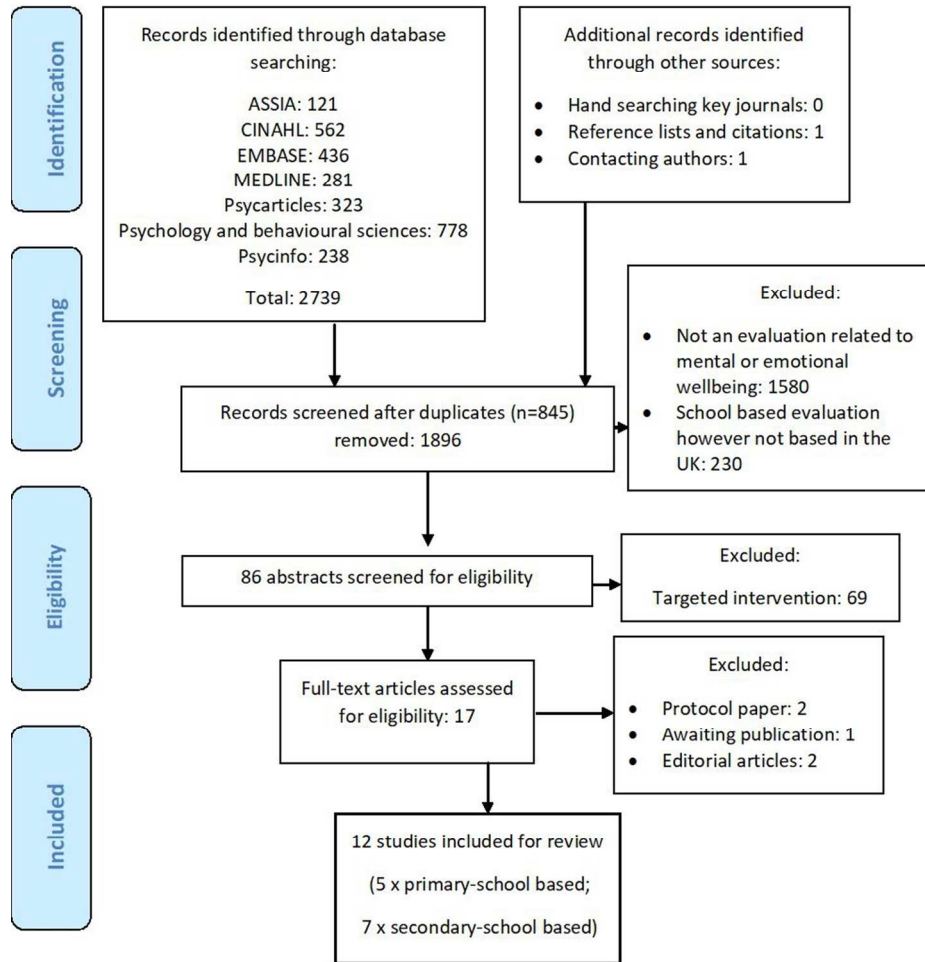

Figure 1: PRISMA diagram of systematic search process.

PRISMA diagram

83x107mm (300 x 300 DPI)

Search strategy database examples, including MeSH terms  
(\* indicates truncation of words).

### ASSIA

((mental health) OR (mental health intervention OR early intervention)) AND ((school based) OR ( scho\* OR educat\*)) AND (united kingdom OR sco\* OR eng\* OR northern Ir\* OR wales OR wel\* OR great britain)) AND (Adolescen\* OR child\* OR teen\* OR youth OR young pe\* OR pupil\* OR student\* OR learner\* OR scho\*)) AND (Anxi\* OR depress\* OR resilien\* OR emotion\* OR stress\* OR psycho\* OR wellbeing\*) AND (Evaluation OR (pilot OR trial) OR (comparison OR effective)) AND (yr(2000-2016) AND PEER(yes)) AND "SCHOOL BASED" or "SCHOOL"

### EMBASE

adolescent health services; adolescent\*; anxi\*; based; brit\*; child\*; community mental health services; depress; depress \*; early intervention (education); emotion\* engl\*; health promotion; ir\*; kingdom; learner\*; mental health; mental health services; northern; pe\*; psycho\*; pupil\*; resilien\*; scho\*; school; school based; school health services; schools; scot\*; stress\*; student\*; teen\*; uk; wales; wel\*; wellbeing\*; young; young pe\*; youth.



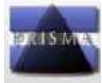

# PRISMA 2009 Checklist

| Section/topic                      | #  | Checklist item                                                                                                                                                                                                                                                                                              | Reported on page # |
|------------------------------------|----|-------------------------------------------------------------------------------------------------------------------------------------------------------------------------------------------------------------------------------------------------------------------------------------------------------------|--------------------|
| <b>TITLE</b>                       |    |                                                                                                                                                                                                                                                                                                             |                    |
| Title                              | 1  | Identify the report as a systematic review, meta-analysis, or both.                                                                                                                                                                                                                                         | 1                  |
| <b>ABSTRACT</b>                    |    |                                                                                                                                                                                                                                                                                                             |                    |
| Structured summary                 | 2  | Provide a structured summary including, as applicable: background; objectives; data sources; study eligibility criteria, participants, and interventions; study appraisal and synthesis methods; results; limitations; conclusions and implications of key findings; systematic review registration number. | 2                  |
| <b>INTRODUCTION</b>                |    |                                                                                                                                                                                                                                                                                                             |                    |
| Rationale                          | 3  | Describe the rationale for the review in the context of what is already known.                                                                                                                                                                                                                              | 5                  |
| Objectives                         | 4  | Provide an explicit statement of questions being addressed with reference to participants, interventions, comparisons, outcomes, and study design (PICOS).                                                                                                                                                  | 6                  |
| <b>METHODS</b>                     |    |                                                                                                                                                                                                                                                                                                             |                    |
| Protocol and registration          | 5  | Indicate if a review protocol exists, if and where it can be accessed (e.g., Web address), and, if available, provide registration information including registration number.                                                                                                                               | na                 |
| Eligibility criteria               | 6  | Specify study characteristics (e.g., PICOS, length of follow-up) and report characteristics (e.g., years considered, language, publication status) used as criteria for eligibility, giving rationale.                                                                                                      | 7                  |
| Information sources                | 7  | Describe all information sources (e.g., databases with dates of coverage, contact with study authors to identify additional studies) in the search and date last searched.                                                                                                                                  | 7-8                |
| Search                             | 8  | Present full electronic search strategy for at least one database, including any limits used, such that it could be repeated.                                                                                                                                                                               | Supp. file         |
| Study selection                    | 9  | State the process for selecting studies (i.e., screening, eligibility, included in systematic review, and, if applicable, included in the meta-analysis).                                                                                                                                                   | 8                  |
| Data collection process            | 10 | Describe method of data extraction from reports (e.g., piloted forms, independently, in duplicate) and any processes for obtaining and confirming data from investigators.                                                                                                                                  | 8                  |
| Data items                         | 11 | List and define all variables for which data were sought (e.g., PICOS, funding sources) and any assumptions and simplifications made.                                                                                                                                                                       | 8                  |
| Risk of bias in individual studies | 12 | Describe methods used for assessing risk of bias of individual studies (including specification of whether this was done at the study or outcome level), and how this information is to be used in any data synthesis.                                                                                      | 8                  |
| Summary measures                   | 13 | State the principal summary measures (e.g., risk ratio, difference in means).                                                                                                                                                                                                                               | 8                  |
| Synthesis of results               | 14 | Describe the methods of handling data and combining results of studies, if done, including measures of consistency (e.g., $I^2$ ) for each meta-analysis.                                                                                                                                                   | 8                  |

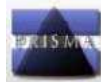

# PRISMA 2009 Checklist

Page 1 of 2

| Section/topic                 | #  | Checklist item                                                                                                                                                                                           | Reported on page # |
|-------------------------------|----|----------------------------------------------------------------------------------------------------------------------------------------------------------------------------------------------------------|--------------------|
| Risk of bias across studies   | 15 | Specify any assessment of risk of bias that may affect the cumulative evidence (e.g., publication bias, selective reporting within studies).                                                             | 8                  |
| Additional analyses           | 16 | Describe methods of additional analyses (e.g., sensitivity or subgroup analyses, meta-regression), if done, indicating which were pre-specified.                                                         | n/a                |
| <b>RESULTS</b>                |    |                                                                                                                                                                                                          |                    |
| Study selection               | 17 | Give numbers of studies screened, assessed for eligibility, and included in the review, with reasons for exclusions at each stage, ideally with a flow diagram.                                          | 9                  |
| Study characteristics         | 18 | For each study, present characteristics for which data were extracted (e.g., study size, PICOS, follow-up period) and provide the citations.                                                             | 10-13              |
| Risk of bias within studies   | 19 | Present data on risk of bias of each study and, if available, any outcome level assessment (see item 12).                                                                                                | 17-20              |
| Results of individual studies | 20 | For all outcomes considered (benefits or harms), present, for each study: (a) simple summary data for each intervention group (b) effect estimates and confidence intervals, ideally with a forest plot. | 17-20              |
| Synthesis of results          | 21 | Present results of each meta-analysis done, including confidence intervals and measures of consistency.                                                                                                  | n/a                |
| Risk of bias across studies   | 22 | Present results of any assessment of risk of bias across studies (see Item 15).                                                                                                                          | n/a                |
| Additional analysis           | 23 | Give results of additional analyses, if done (e.g., sensitivity or subgroup analyses, meta-regression [see Item 16]).                                                                                    | n/a                |
| <b>DISCUSSION</b>             |    |                                                                                                                                                                                                          |                    |
| Summary of evidence           | 24 | Summarize the main findings including the strength of evidence for each main outcome; consider their relevance to key groups (e.g., healthcare providers, users, and policy makers).                     | 22-25              |
| Limitations                   | 25 | Discuss limitations at study and outcome level (e.g., risk of bias), and at review-level (e.g., incomplete retrieval of identified research, reporting bias).                                            | 26                 |
| Conclusions                   | 26 | Provide a general interpretation of the results in the context of other evidence, and implications for future research.                                                                                  | 26-27              |
| <b>FUNDING</b>                |    |                                                                                                                                                                                                          |                    |
| Funding                       | 27 | Describe sources of funding for the systematic review and other support (e.g., supply of data); role of funders for the systematic review.                                                               | 28                 |

From: Moher D, Liberati A, Tetzlaff J, Altman DG, The PRISMA Group (2009). Preferred Reporting Items for Systematic Reviews and Meta-Analyses: The PRISMA Statement. PLoS Med 6(7): e1000097. doi:10.1371/journal.pmed1000097

For more information, visit: [www.prisma-statement.org](http://www.prisma-statement.org).

Page 2 of 2

For peer review only - <http://bmjopen.bmj.com/site/about/guidelines.xhtml>
