# Supplementary material for: Universal, school-based interventions to promote mental and emotional well-being: what is being done in the UK and does it work? A systematic review
Source: PubMed Central journal article supplement (PMC6129100; doi:10.1136/bmjopen-2018-022560), 2018-09-08
Supplement: bmjopen-2018-022560supp001.pdf [file bmjopen-2018-022560supp001.pdf]

Search strategy database examples, including MeSH terms  
(\* indicates truncation of words).

**ASSIA**

((mental health) OR (mental health intervention OR early intervention)) AND ((school based) OR (scho\* OR educat\*)) AND (united kingdom OR sco\* OR eng\* OR northern Ir\* OR wales OR wel\* OR great britain)) AND (Adolescen\* OR child\* OR teen\* OR youth OR young pe\* OR pupil\* OR student\* OR learner\* OR scho\*) AND (Anxi\* OR depress\* OR resilien\* OR emotion\* OR stress\* OR psycho\* OR wellbeing\*) AND (Evaluation OR (pilot OR trial) OR (comparison OR effective)) AND (yr(2000-2016) AND PEER(yes)) AND "SCHOOL BASED" or "SCHOOL"

**EMBASE**

adolescent health services; adolescent\*; anxi\*; based; brit\*; child\*; community mental health services; depress; depress \*; early intervention (education); emotion\* engl\*; health promotion; ir\*; kingdom; learner\*; mental health; mental health services; northern; pe\*; psycho\*; pupil\*; resilien\*; scho\*; school; school based; school health services; schools; scot\*; stress\*; student\*; teen\*; uk; wales; wel\*; wellbeing\*; young; young pe\*; youth.
